# Supplementary material for: Development of Antibacterial and Antifungal Triazole Chromium(III) and Cobalt(II) Complexes: Synthesis and Biological Activity Evaluations
Source: PubMed Central journal article supplement (PMC6222626; doi:10.3390/molecules23082013), 2018-08-13
Supplement: molecules-23-02013-s001.pdf [file molecules-23-02013-s001.pdf]

*Supplementary Materials*

**Development of Antibacterial and Antifungal Triazole Chromium(III) and Cobalt(II) Complexes: Synthesis and Biological Activity Evaluations**

Ricardo A. Murcia<sup>1</sup>, Sandra M. Leal<sup>2,3</sup>, Martha V. Roa<sup>2,3</sup>, Edgar Nagles<sup>4</sup>, Alvaro Muñoz-Castro<sup>5</sup> and John J. Hurtado<sup>1\*</sup>

<sup>1</sup>Departamento of Chemistry, Universidad de los Andes, Carrera 1 No. 18A-12, 111711, Bogotá-Colombia

<sup>2</sup>Programa de Bacteriología y Laboratorio Clínico, Facultad de Ciencias de la Salud, Universidad de Santander, Bucaramanga, Colombia

<sup>3</sup>Programa de Maestría en Investigación en Enfermedades Infecciosas, Facultad de Ciencias de la Salud, Universidad de Santander, Bucaramanga, Colombia

<sup>4</sup>Facultad de Ciencias Naturales y Matemáticas, Universidad de Ibagué, Carrera 22 Calle 67, 730001, Ibagué

<sup>5</sup>Grupo de Química Inorgánica y Materiales Moleculares, Universidad Autónoma de Chile, El Llano Subercaseaux 2801, Santiago, Chile.

\*Corresponding author.

*E-mail address:* [jj.hurtado@uniandes.edu.co](mailto:jj.hurtado@uniandes.edu.co) (J. Hurtado), Tel.: +57-1-339-4949 (ext. 3468)

ORCID ID: 0000-0002-0511-9719

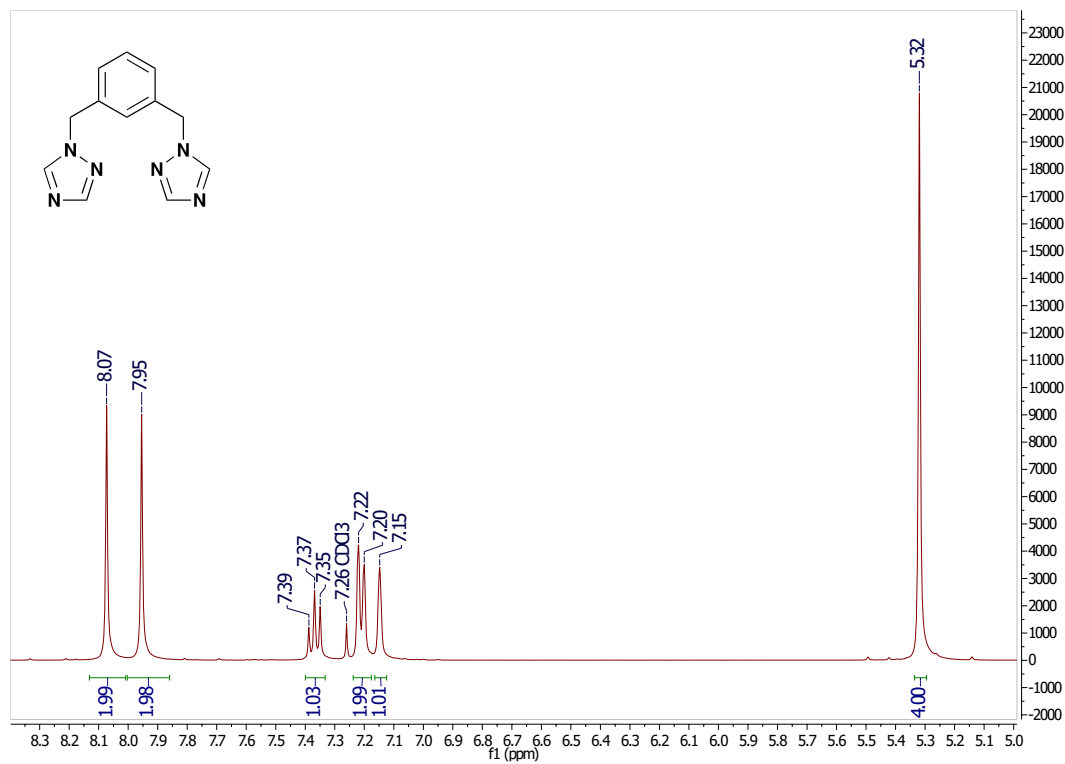

**Figure S1.** <sup>1</sup>H RMN spectrum of (L1). CDCl<sub>3</sub>

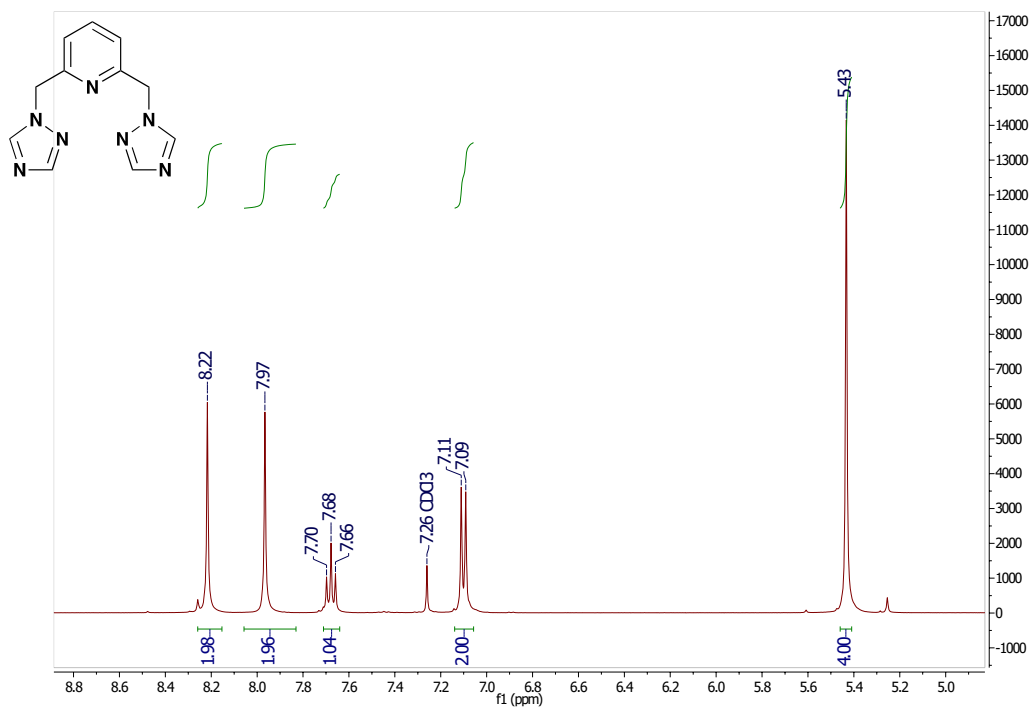

**Figure S2.** <sup>1</sup>H RMN spectrum of (L2). CDCl<sub>3</sub>

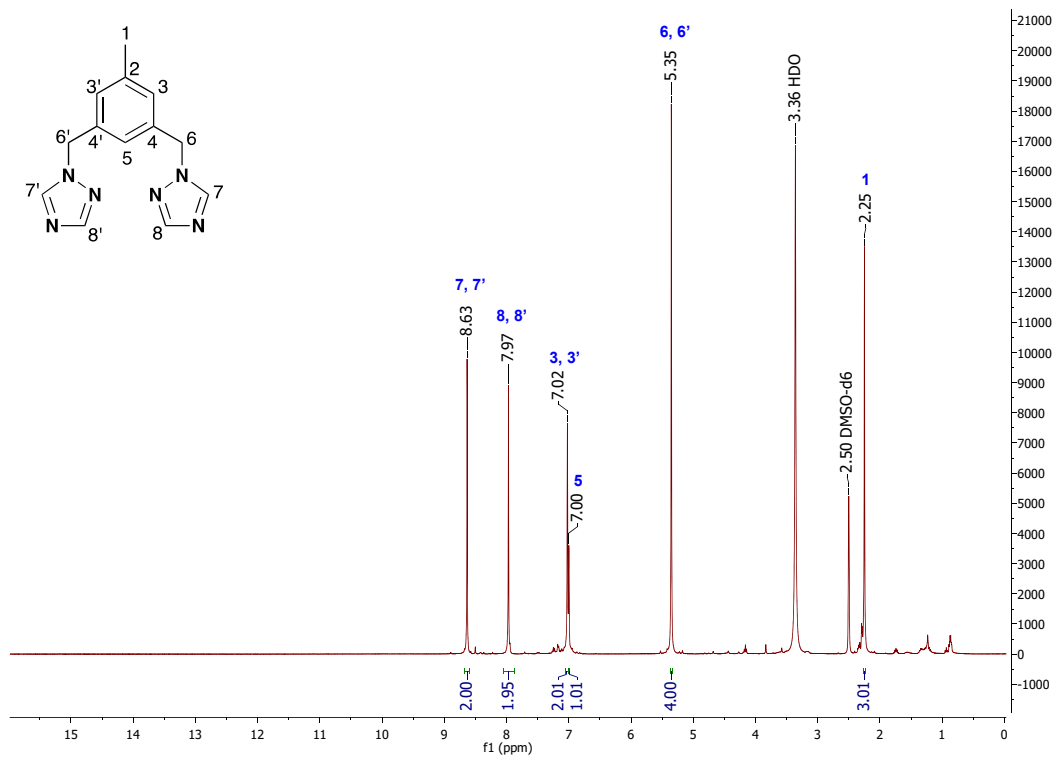

**Figure S3.  $^1\text{H}$  RMN spectrum of (1).**

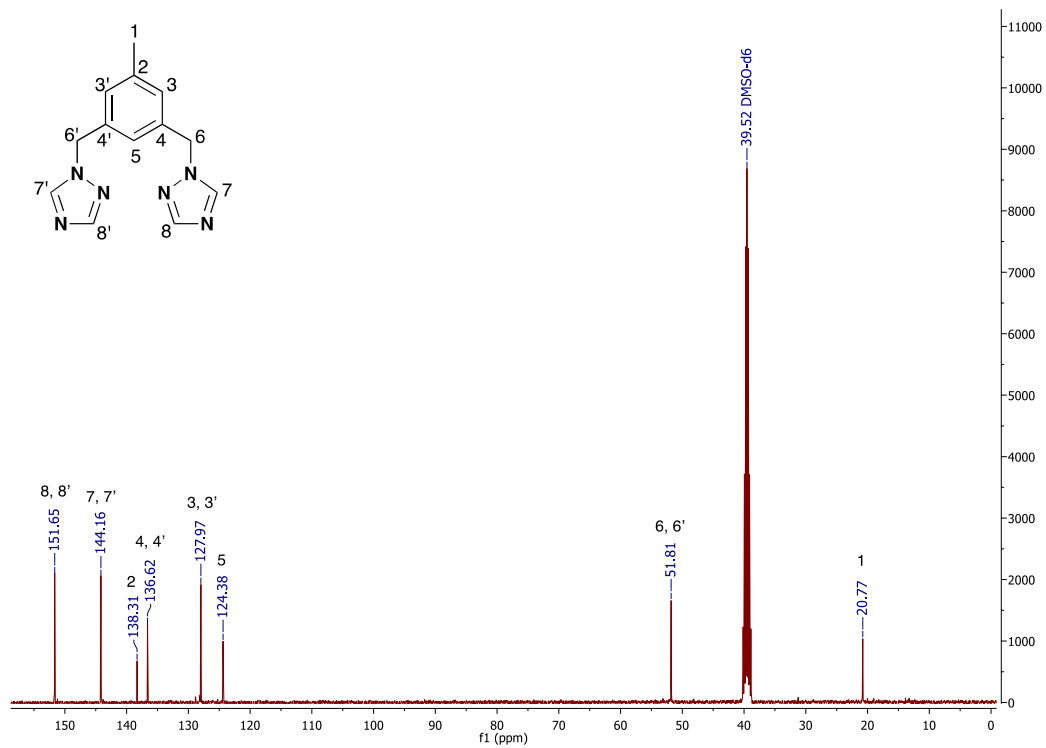

**Figure S4.  $^{13}\text{C}$  RMN spectrum of (1).**

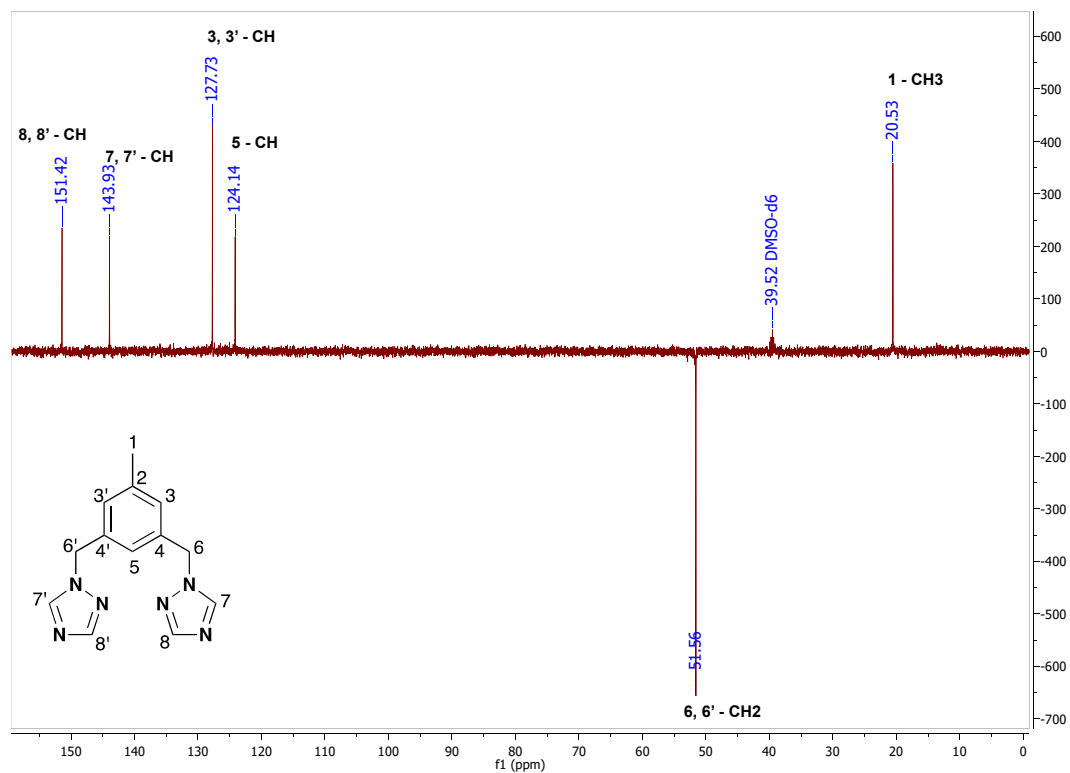

Figure S5. DEPT 135 spectrum of (1).

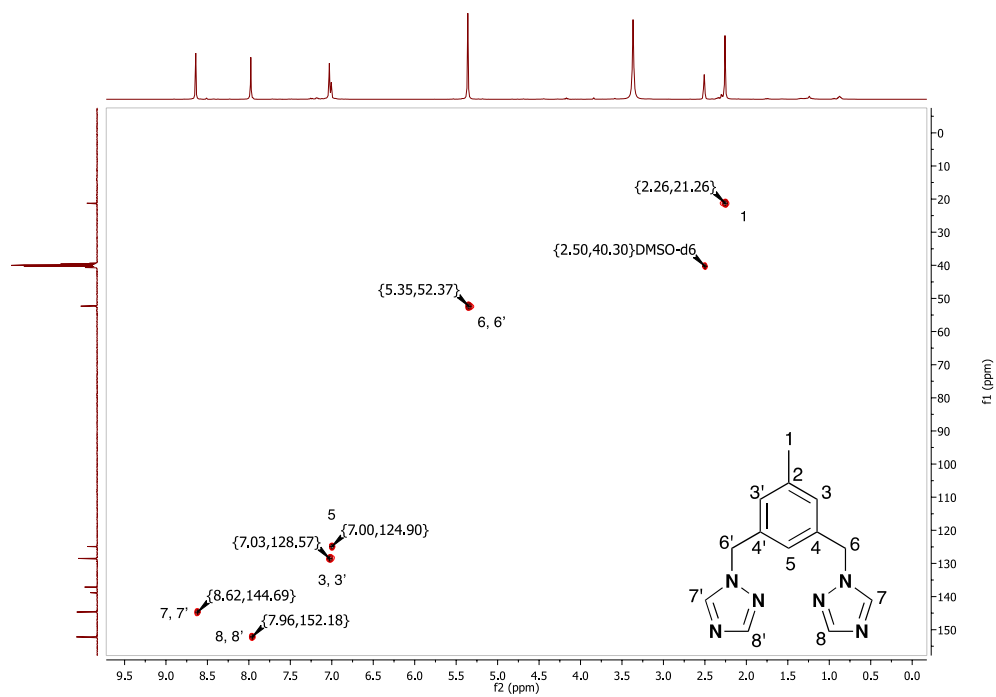

Figure S6. HSQC spectrum of (1).

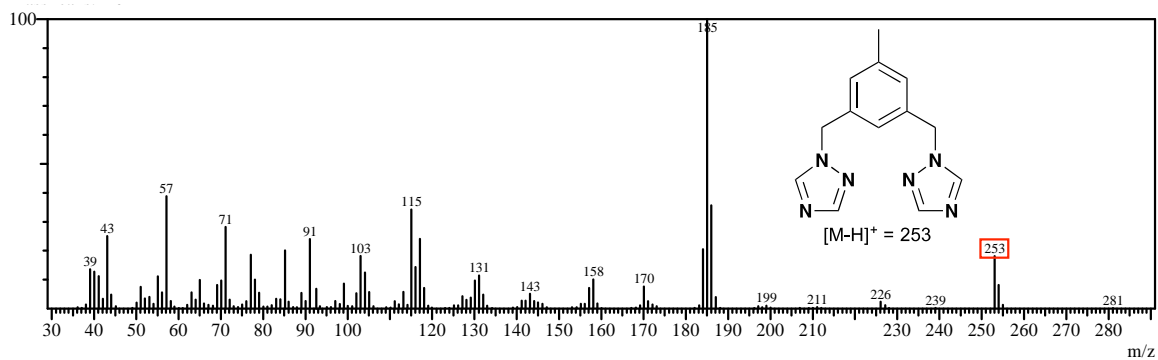

**Figure S7.** Mass spectrum of (1).

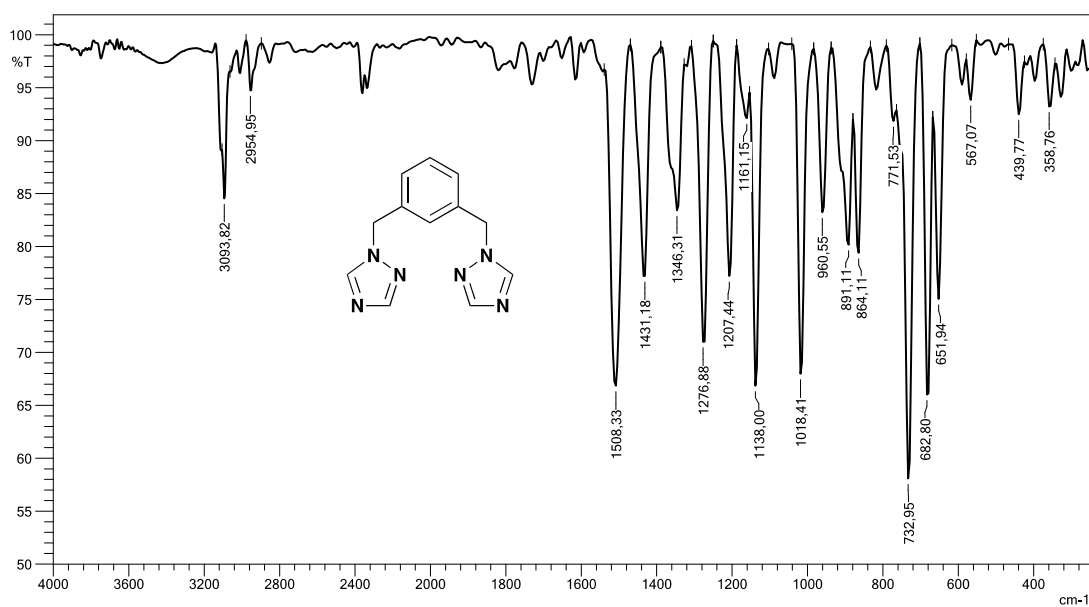

**Figure S8.** IR spectrum of (L1).

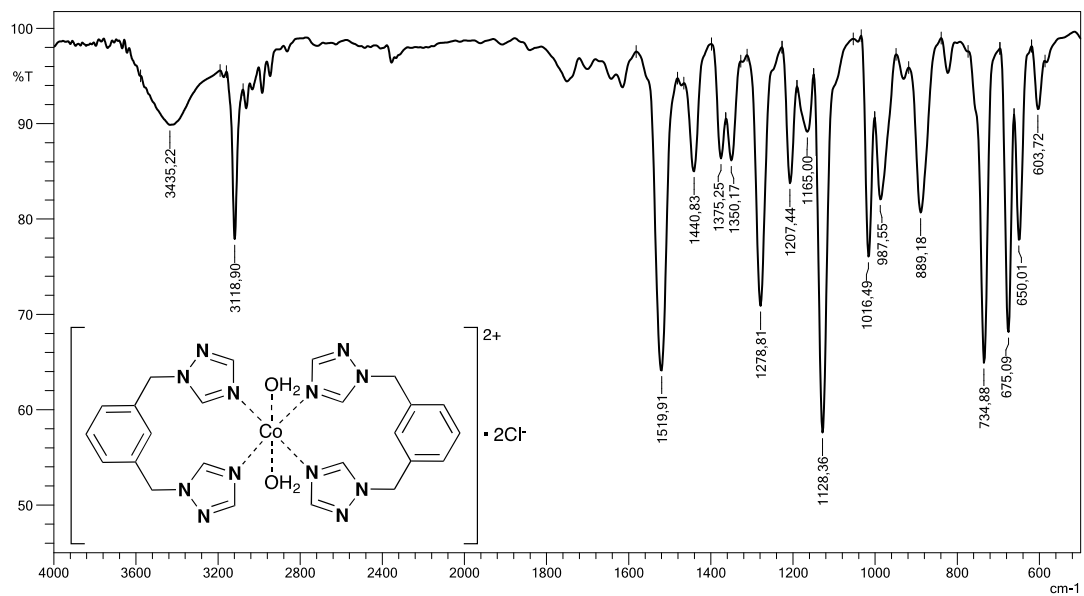

**Figure S9.** IR spectrum of (2).

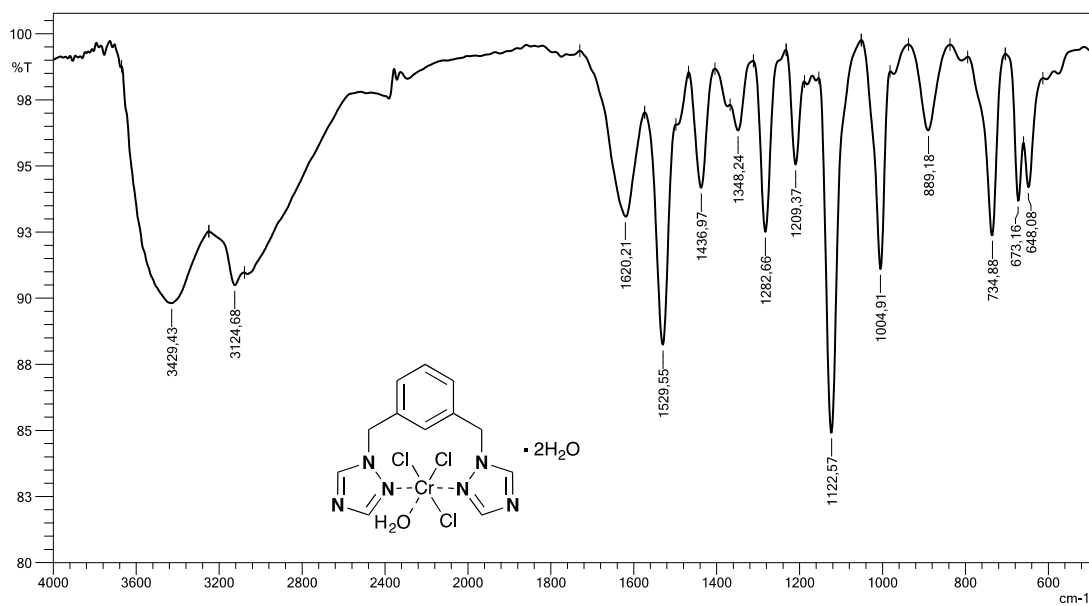

**Figure S9.** IR spectrum of (5).

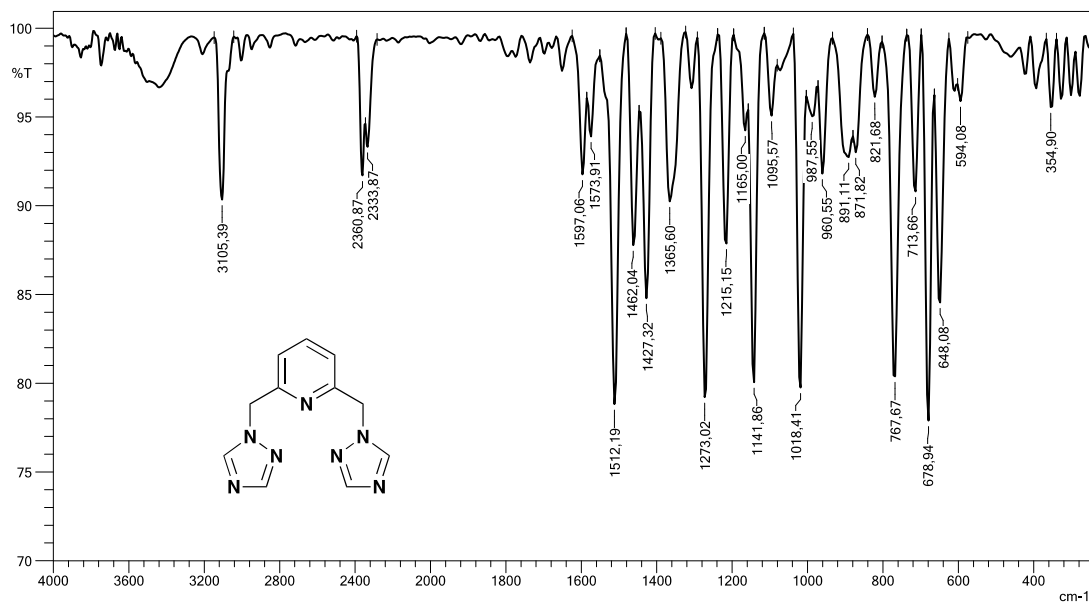

**Figure S10.** IR spectrum of (L2).

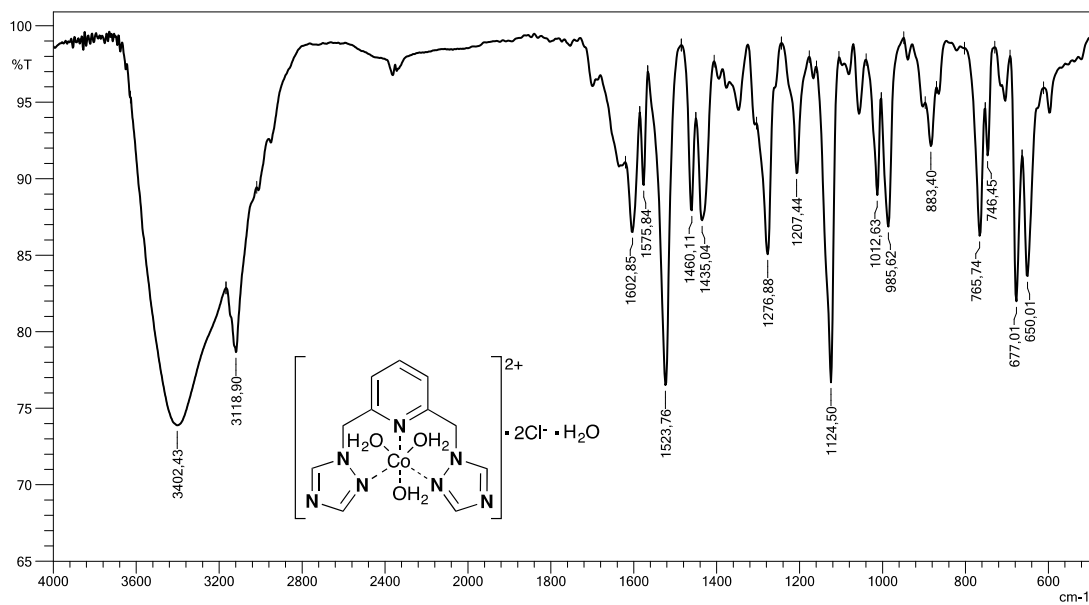

**Figure S11.** IR spectrum of (3).

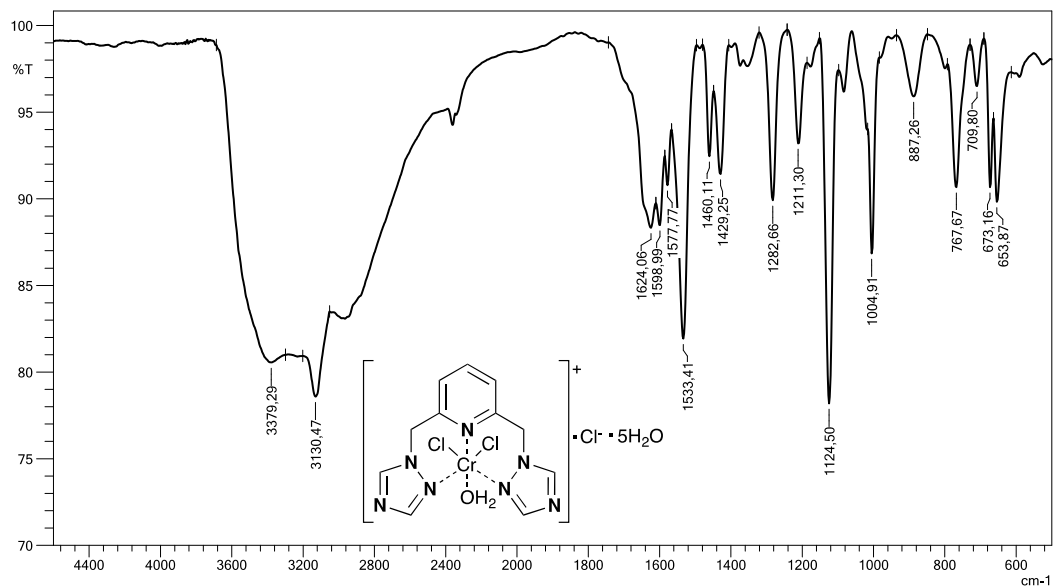

**Figure S12.** IR spectrum of (6).

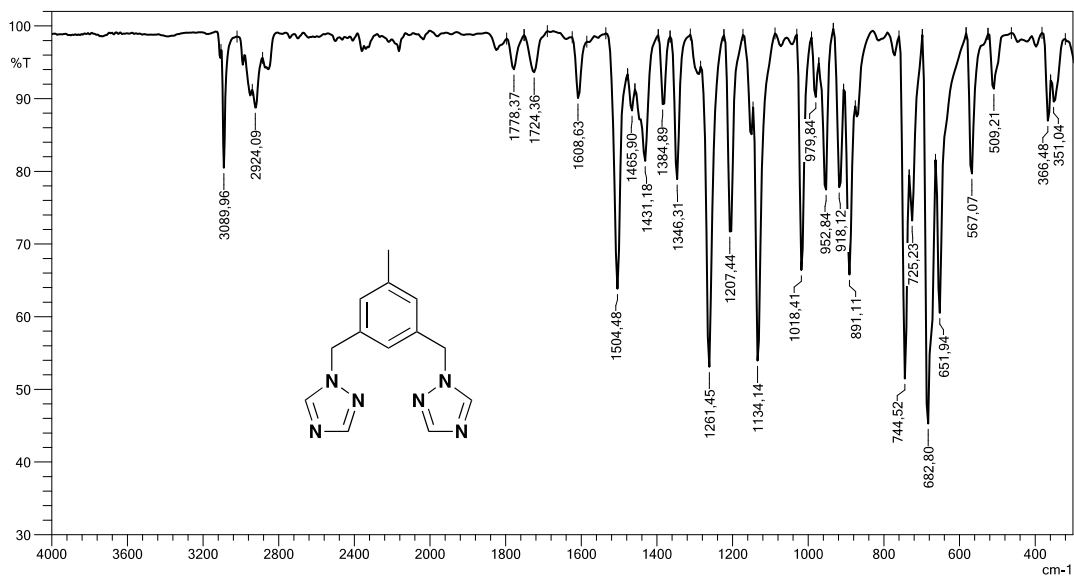

**Figure S13.** IR spectrum of (1).



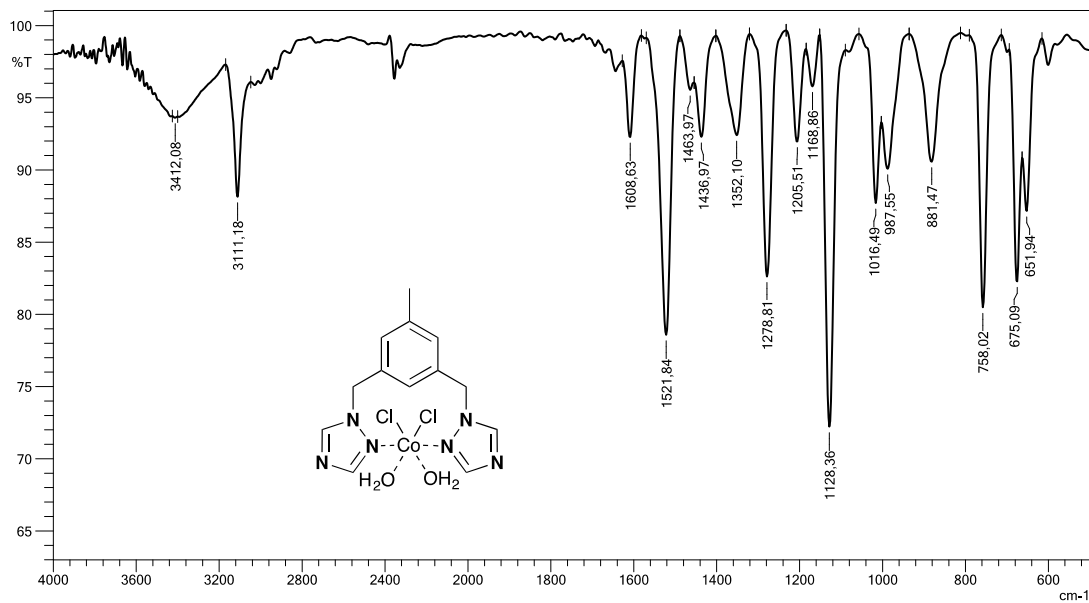

**Figure S14.** IR spectrum of (4).

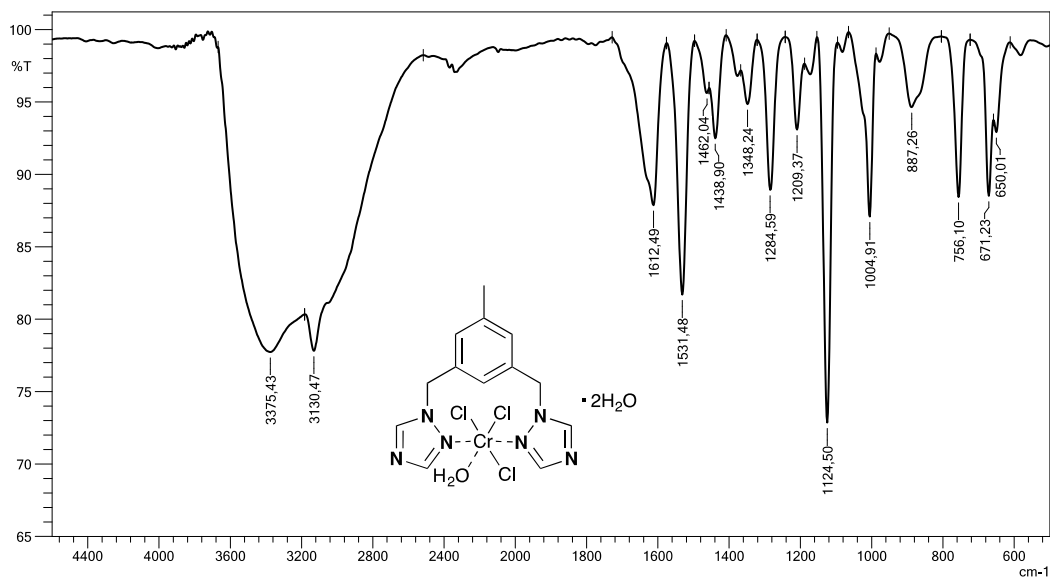

**Figure S15.** IR spectrum of (7).

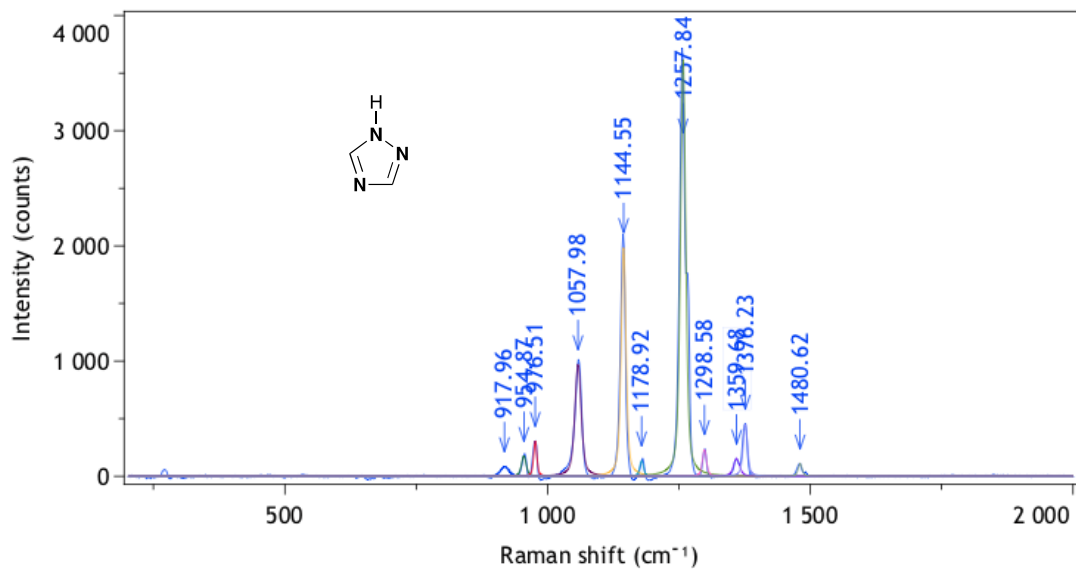

**Figure S16.** Raman spectrum of 1*H*-1,2,4-triazole.

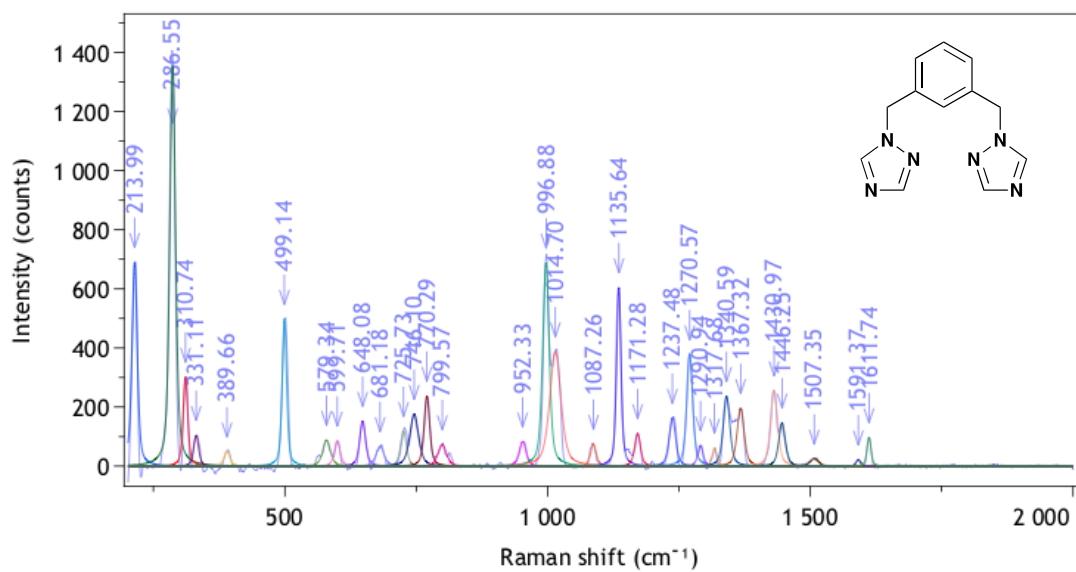

**Figure S17.** Raman spectrum of (L1).

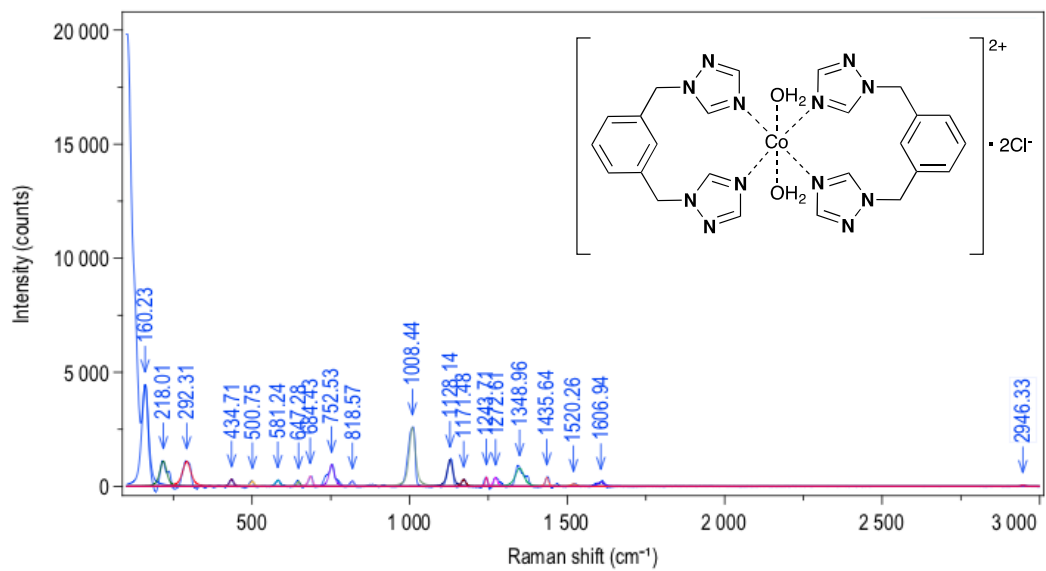

**Figure S18.** Raman spectrum of (2).

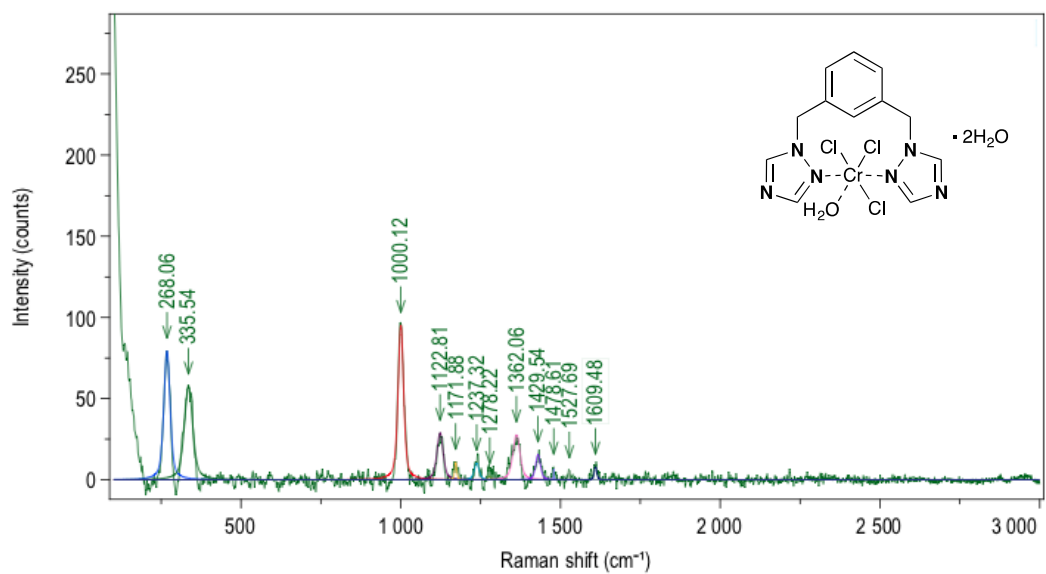

**Figure S19.** Raman spectrum of (5).

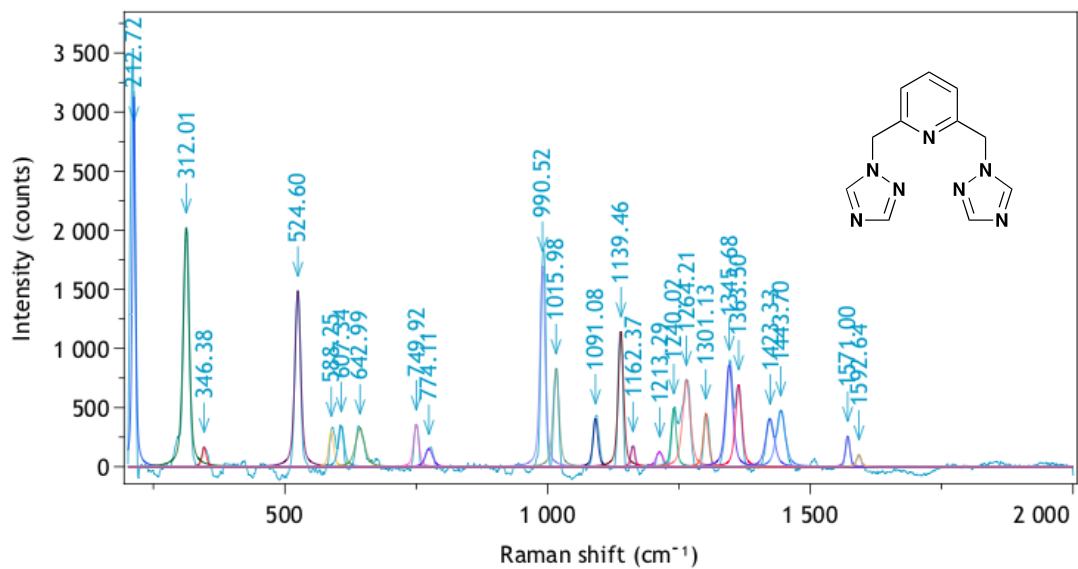

**Figure S20.** Raman spectrum of (L2).

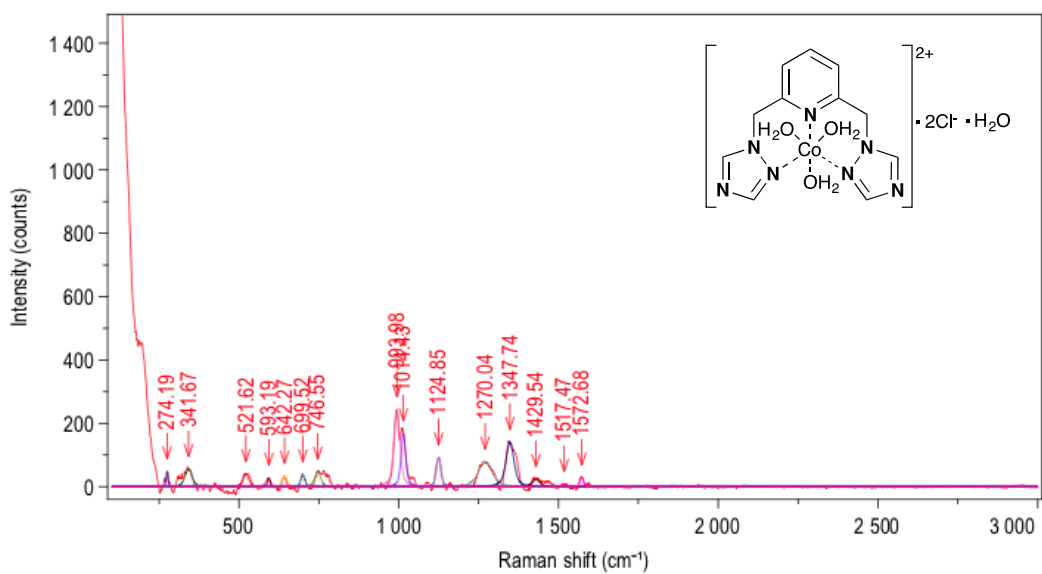

**Figure S21.** Raman spectrum of (3).

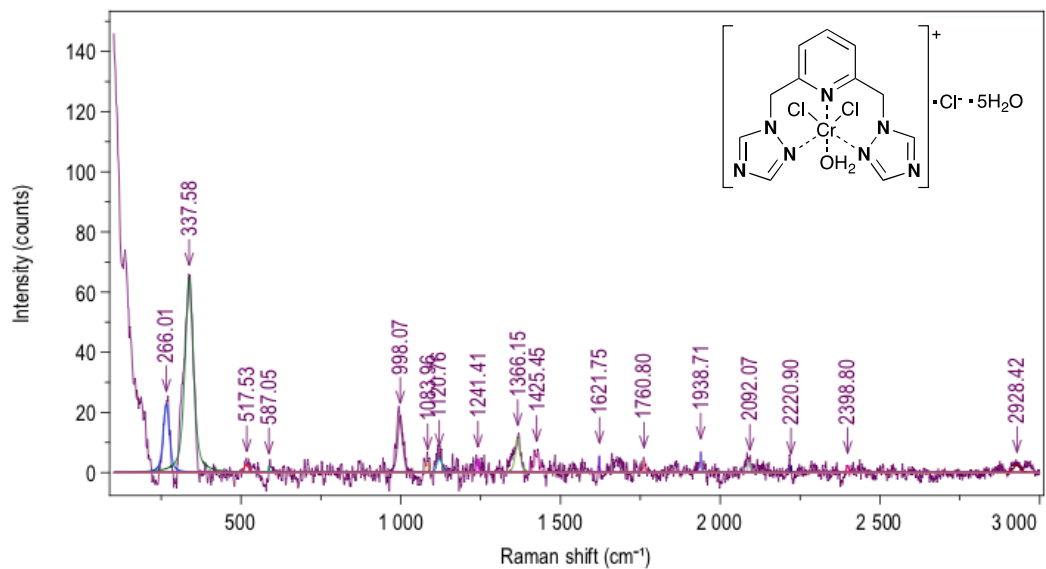

**Figure S22.** Raman spectrum of (6).

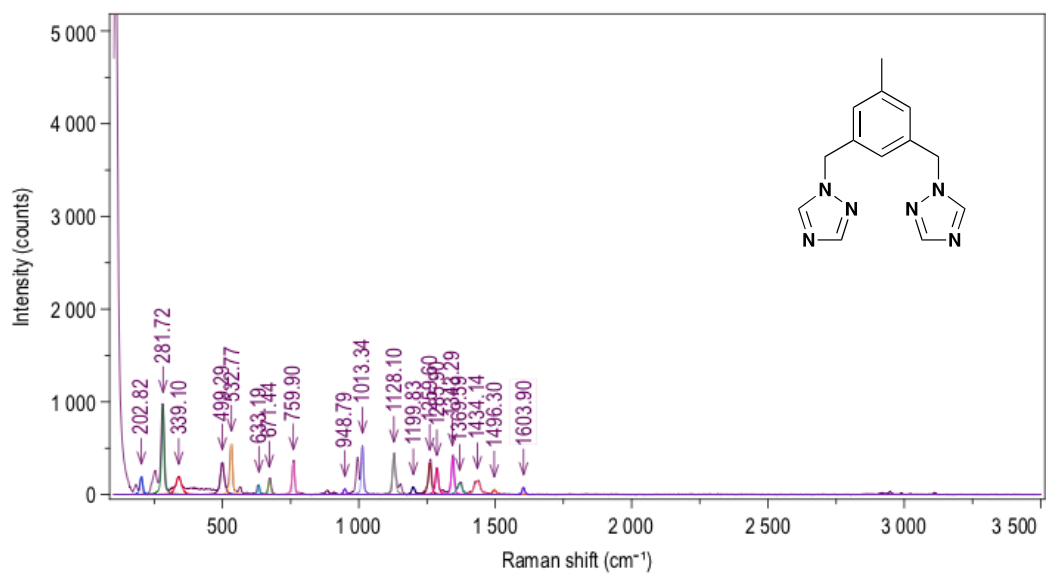

**Figure S23.** Raman spectrum of (1).

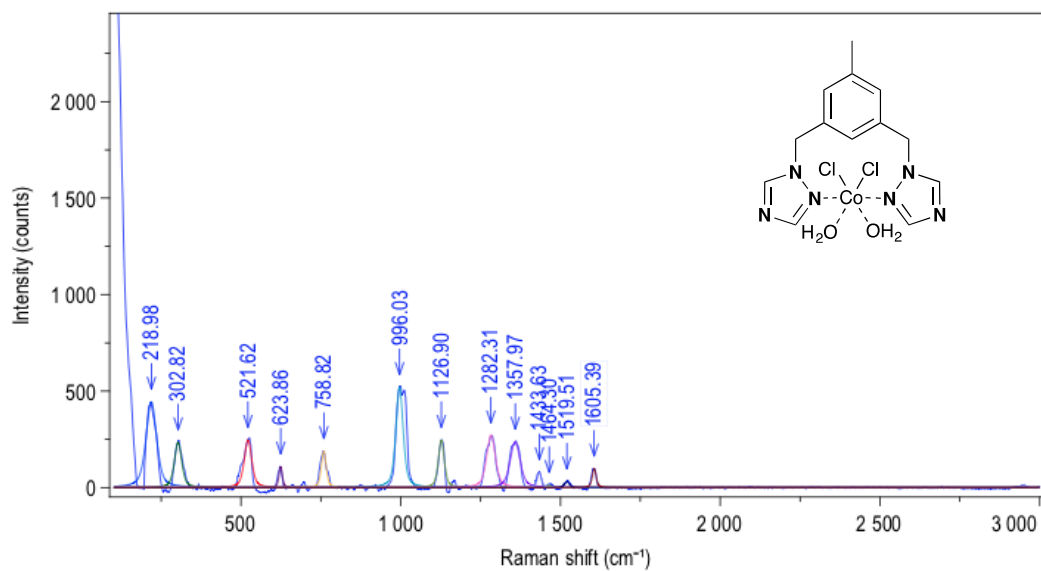

**Figure S24.** Raman spectrum of (4).

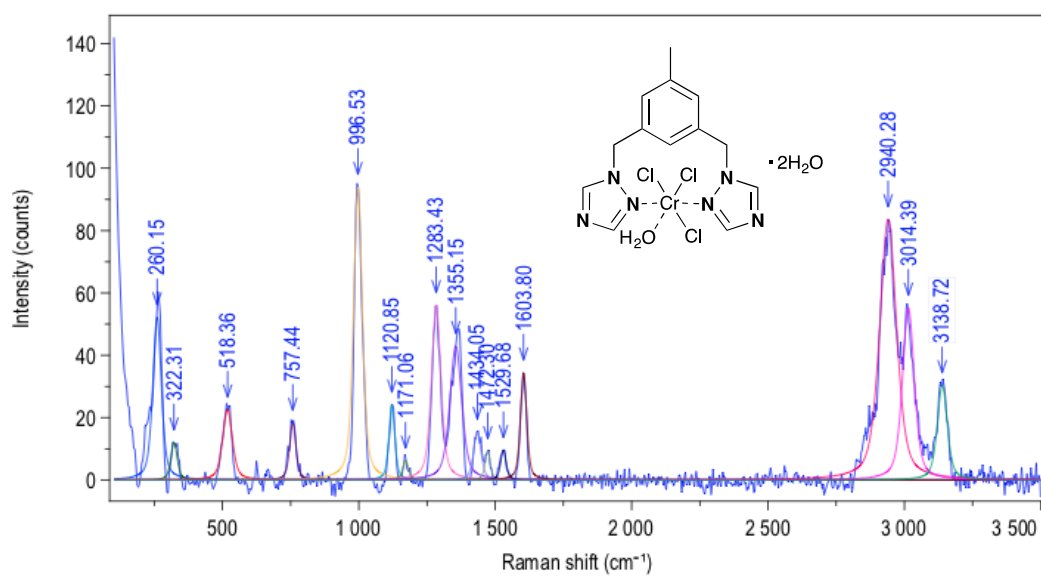

**Figure S25.** Raman spectrum of (7).

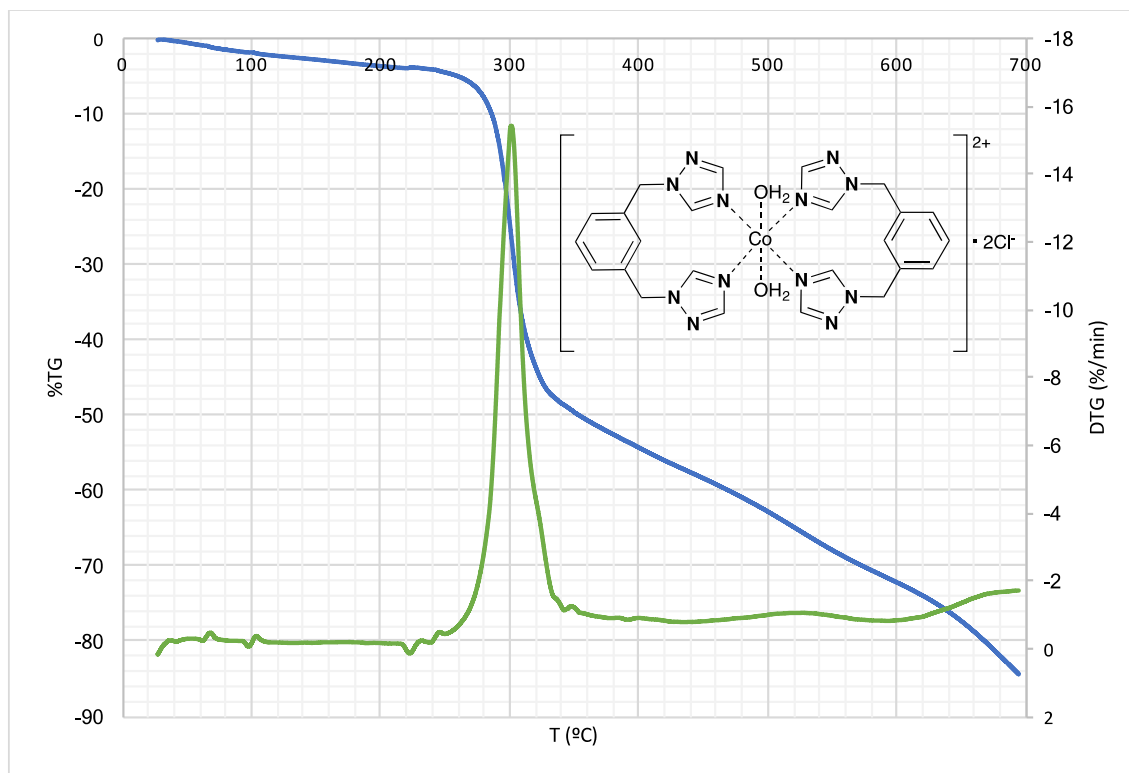

**Figure S26.** TGA and DTG of (2).

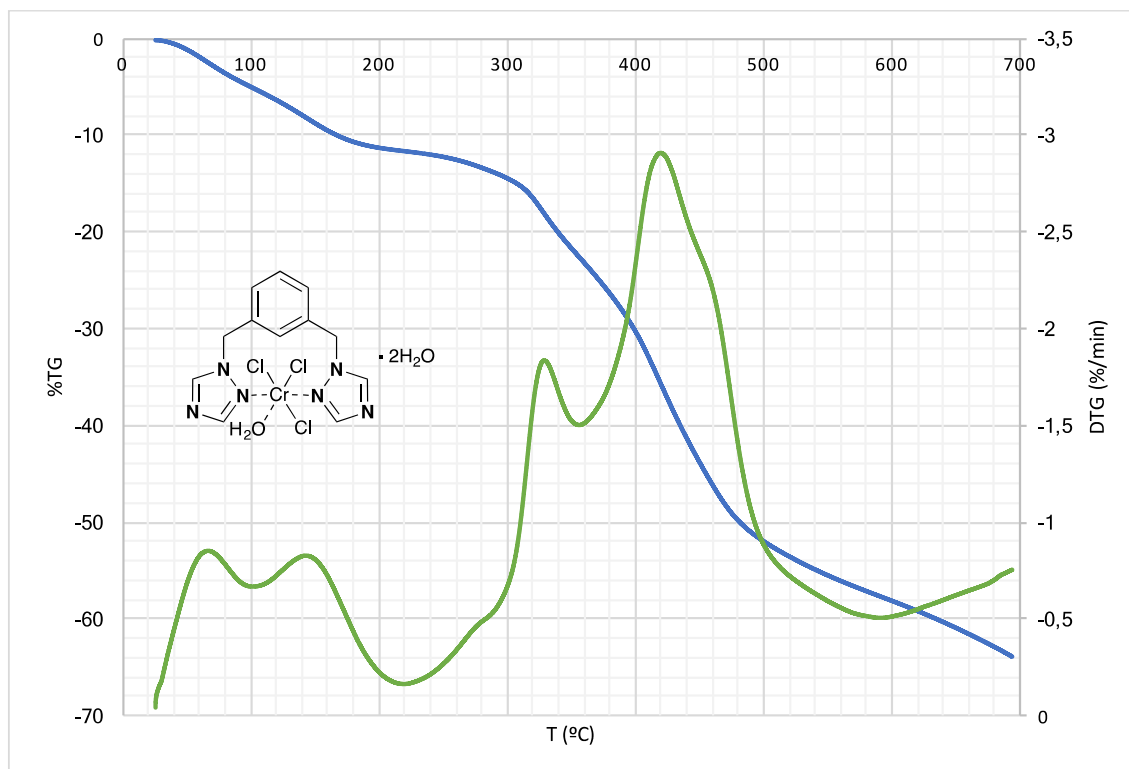

**Figure S27.** TGA and DTG of (5).

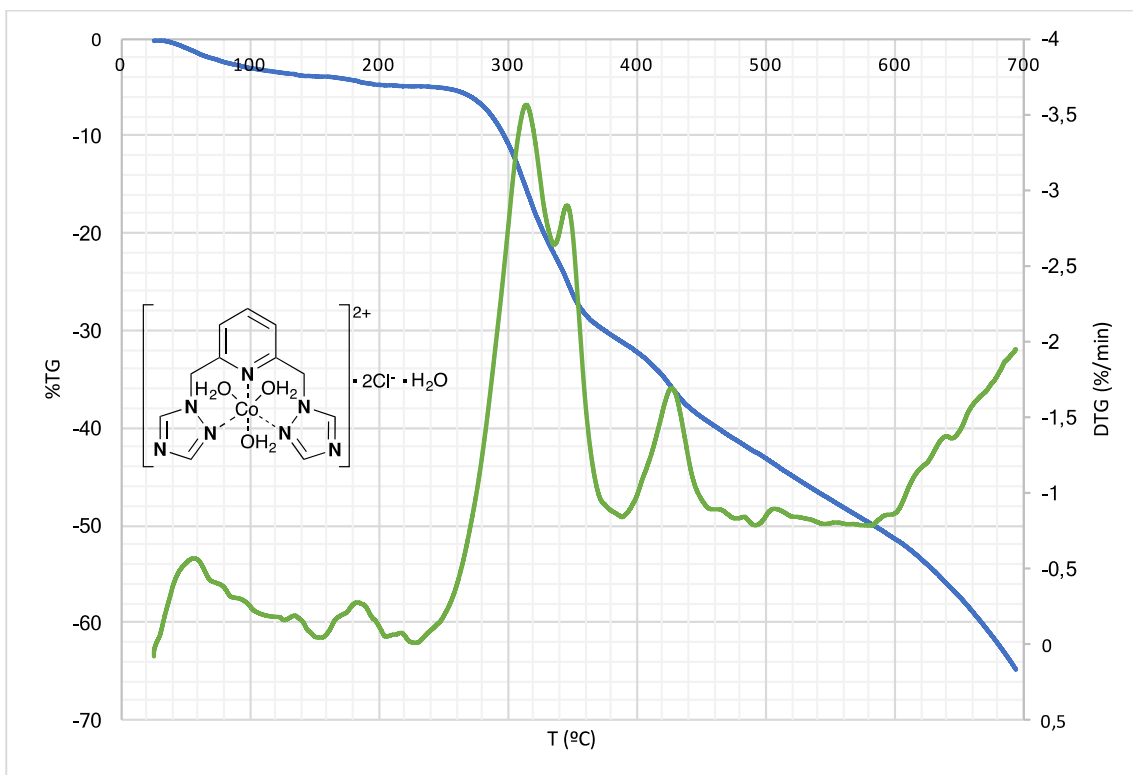

**Figure S28.** TGA and DTG of (3).

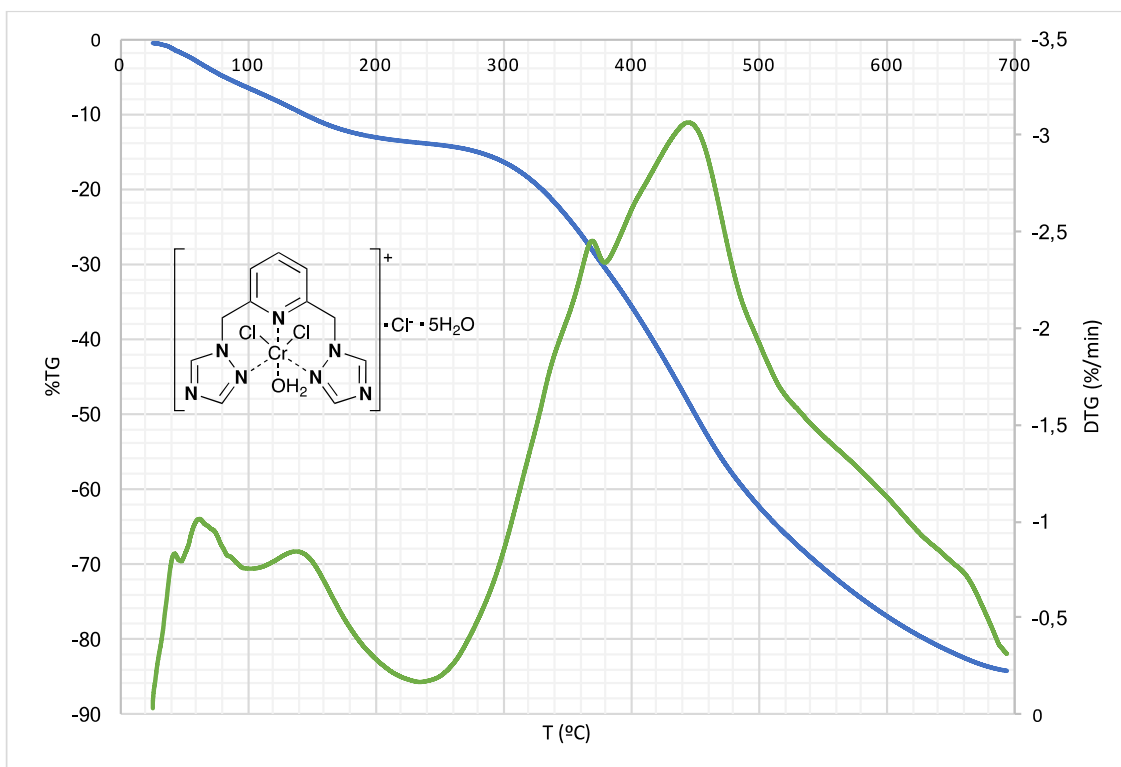

**Figure S29.** TGA and DTG of (6).



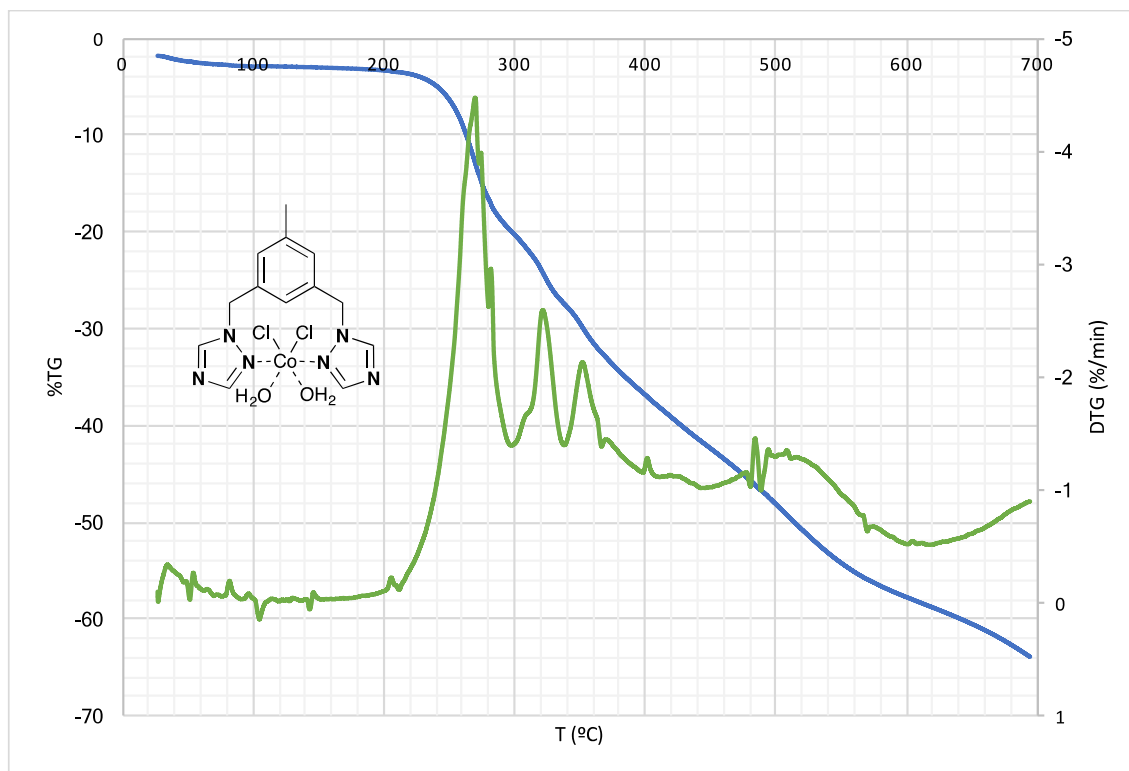

**Figure S30.** TGA and DTG of (4).

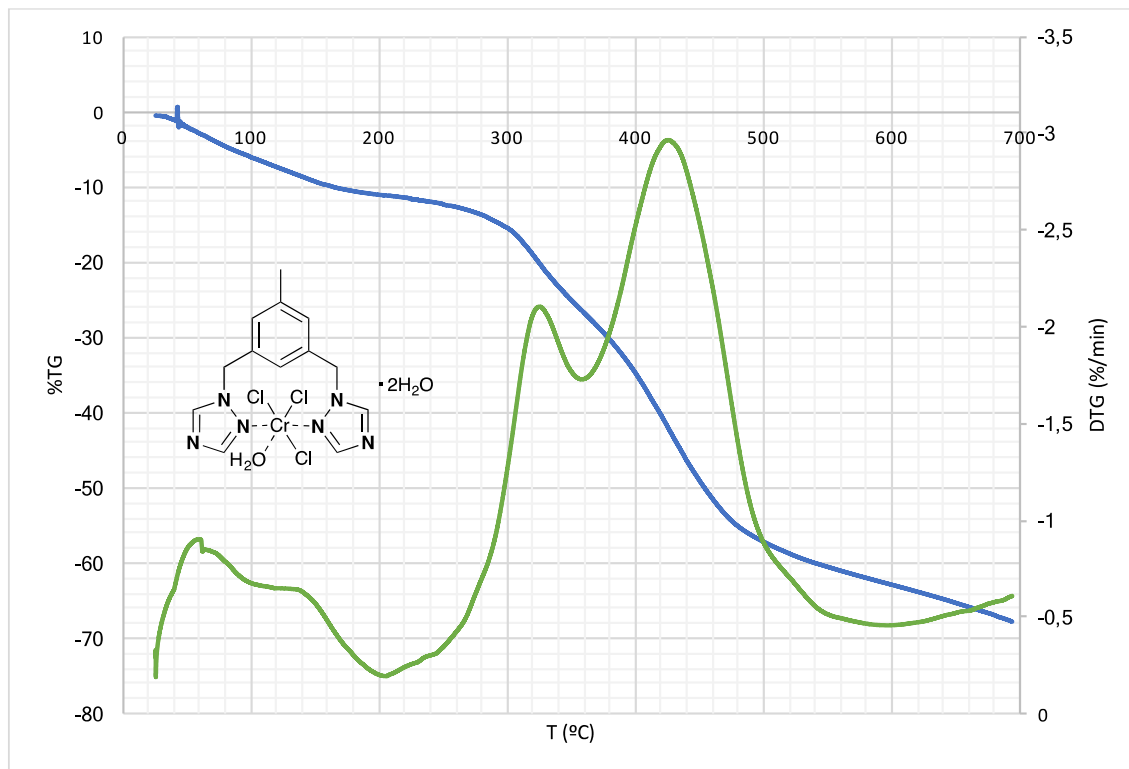

**Figure S31.** TGA and DTG of (7).

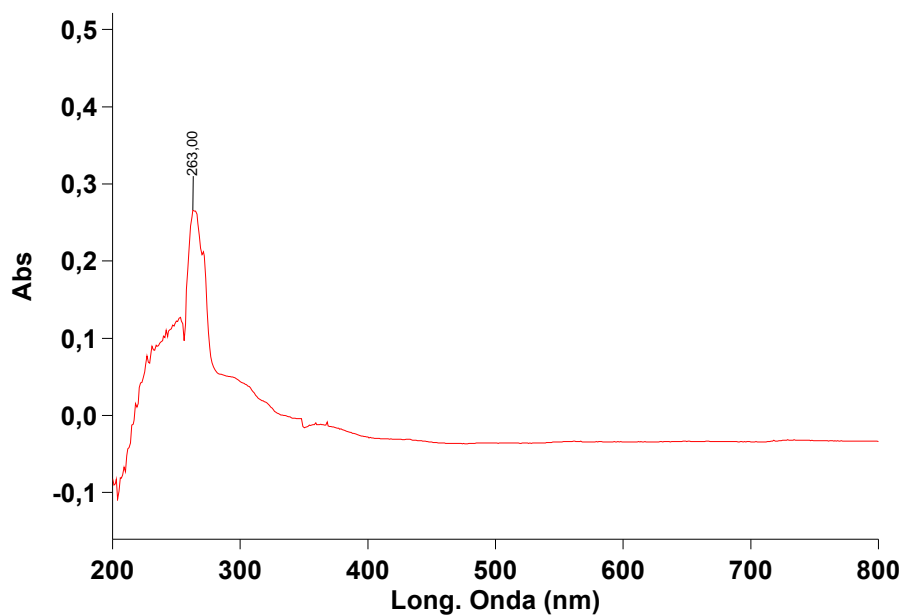

**Figure S323.** Absorption spectrum of (**L1**) in DMSO (1 mM).

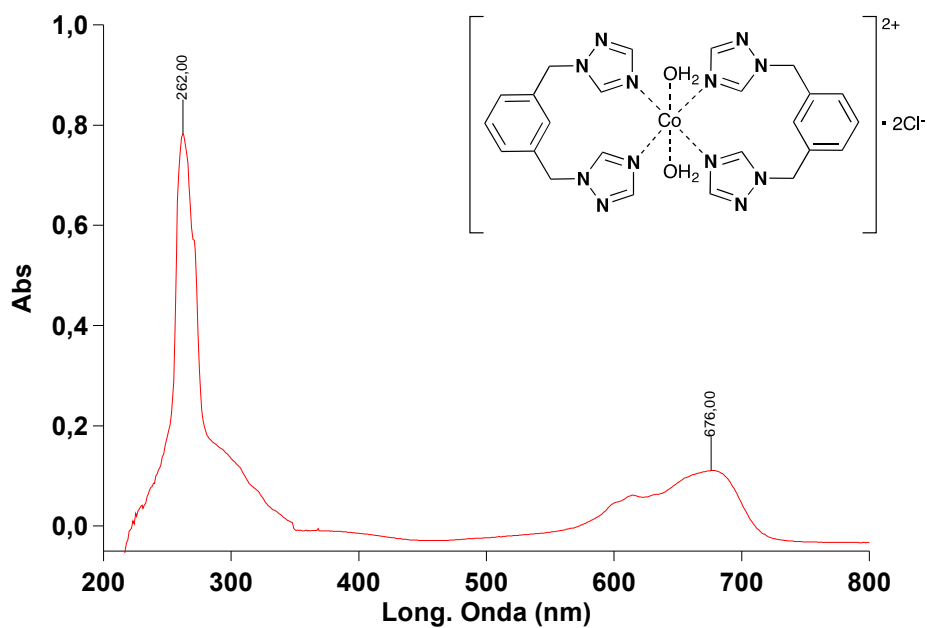

**Figure S334.** Absorption spectrum of (**2**) in DMSO (1 mM).

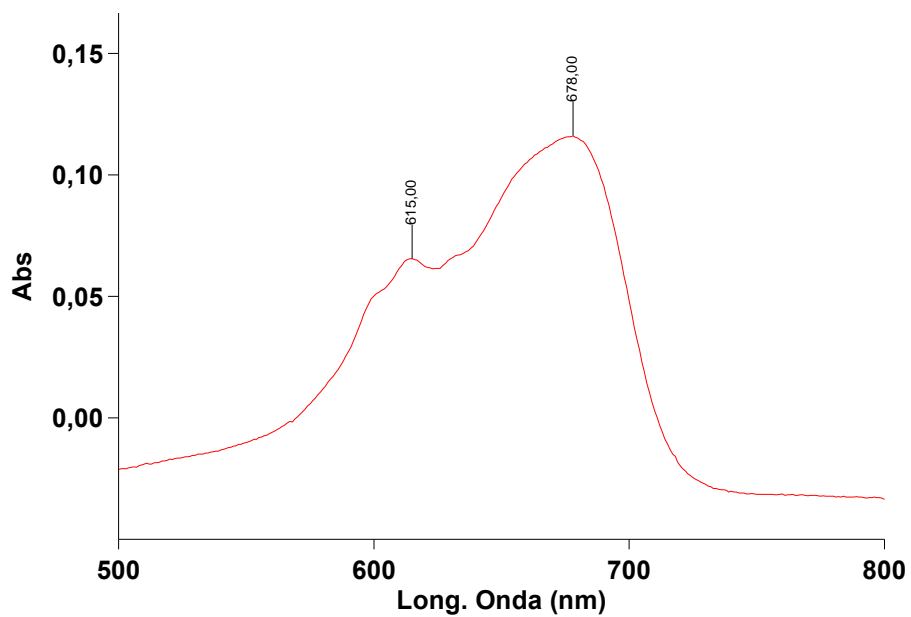

Figure S345. Absorption spectrum of (2) in DMSO (1 mM) zone 500-800 nm

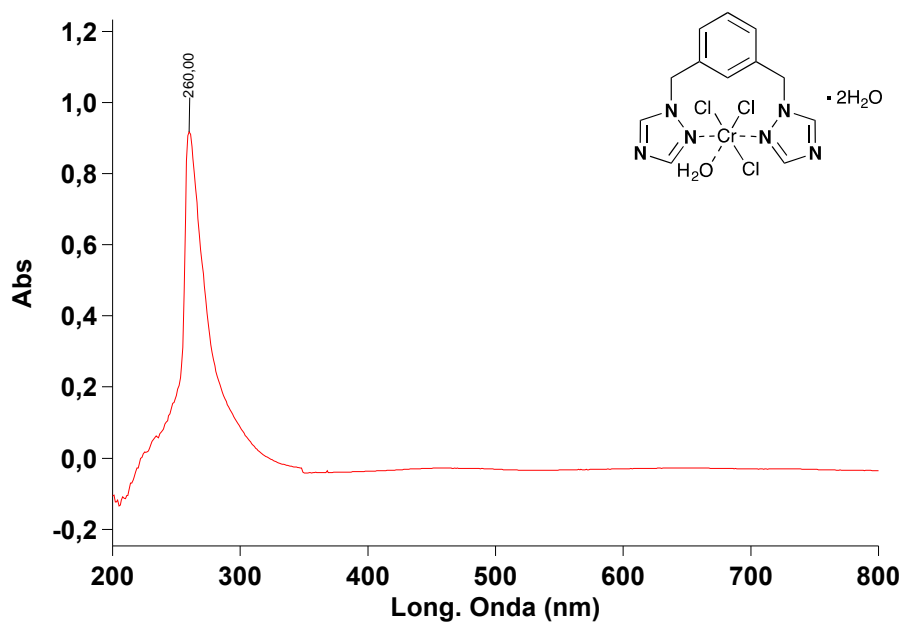

Figure S356. Absorption spectrum of (5) in DMSO (0,25 mM).

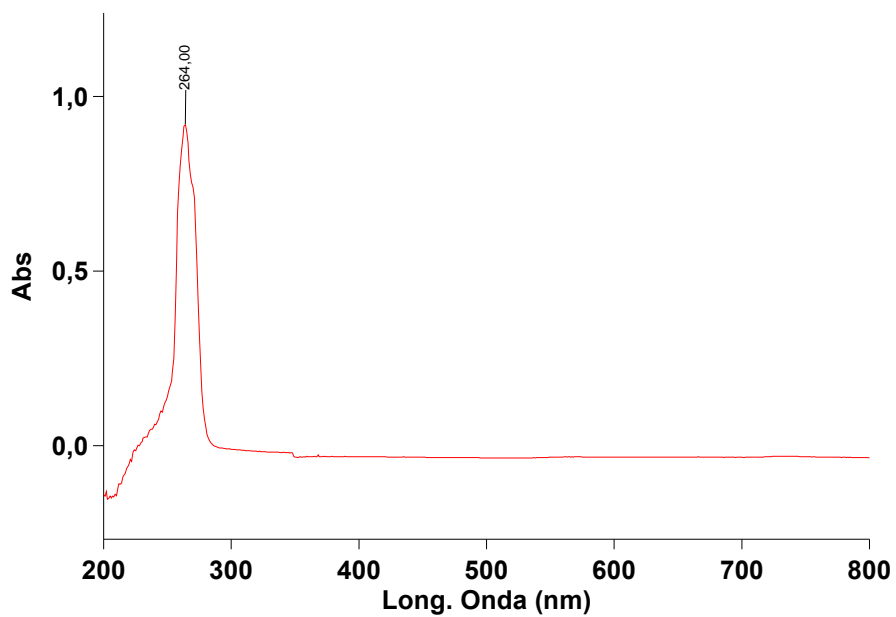

Figure S367. Absorption spectrum of (L2) in DMSO (0,21 mM).

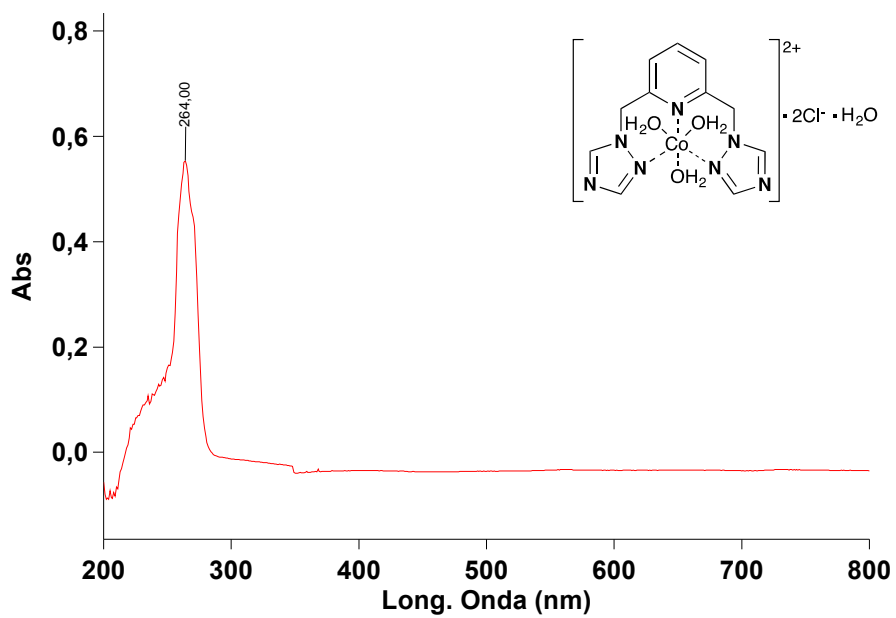

Figure S37. Absorption spectrum of (3) in DMSO (0,17 mM).

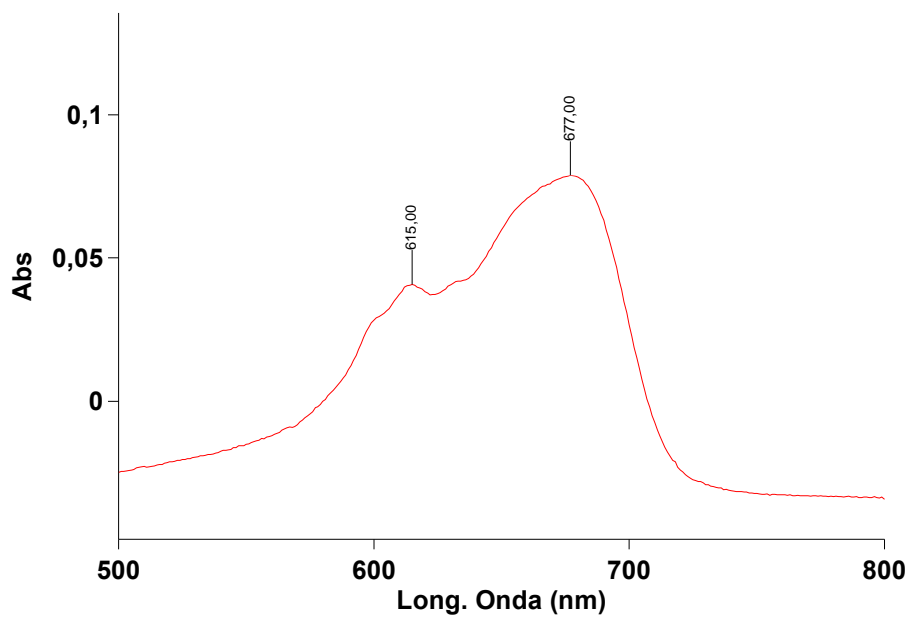

**Figure S389.** Absorption spectrum of (3) in DMSO (1 mM); zone 500-800nm.

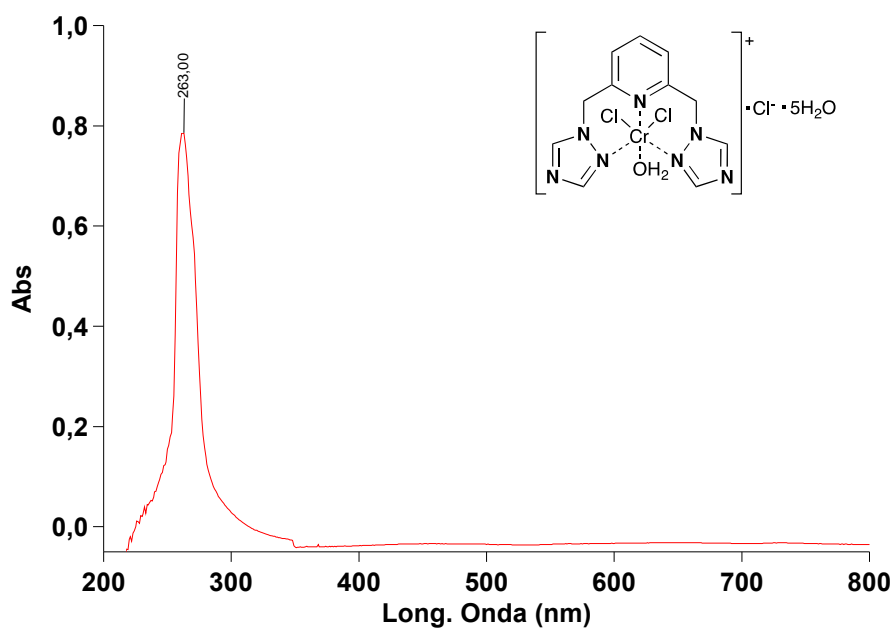

**Figure S40.** Absorption spectrum of (6) in DMSO (0,11 mM).

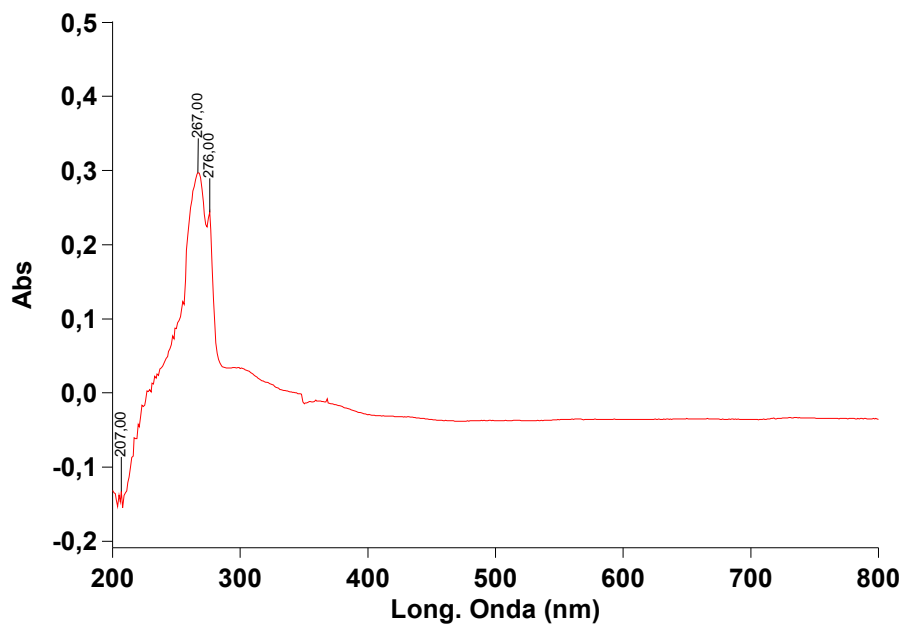

Figure S41. Absorption spectrum of (1) in DMSO (1 mM).

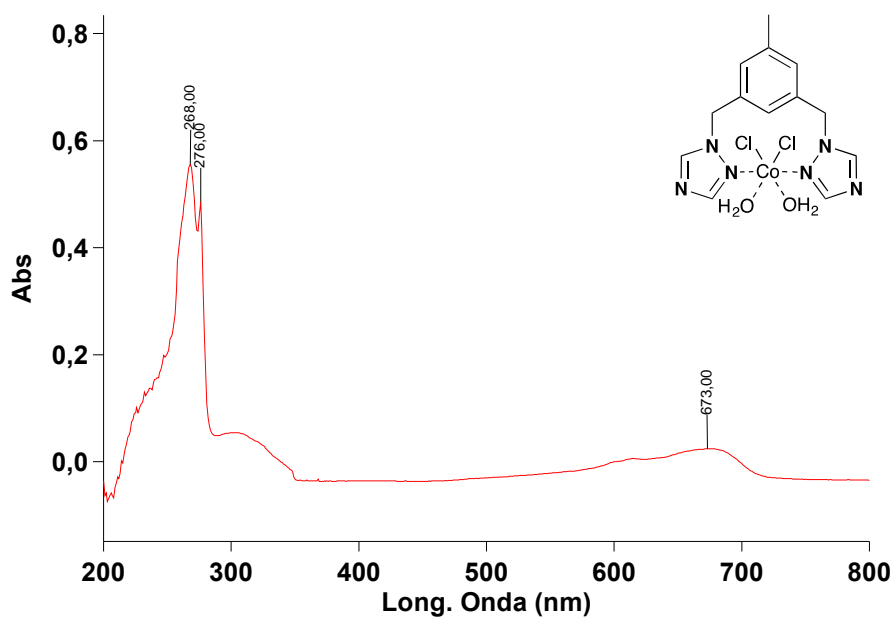

Figure S42. Absorption spectrum of (4) in DMSO (1 mM).

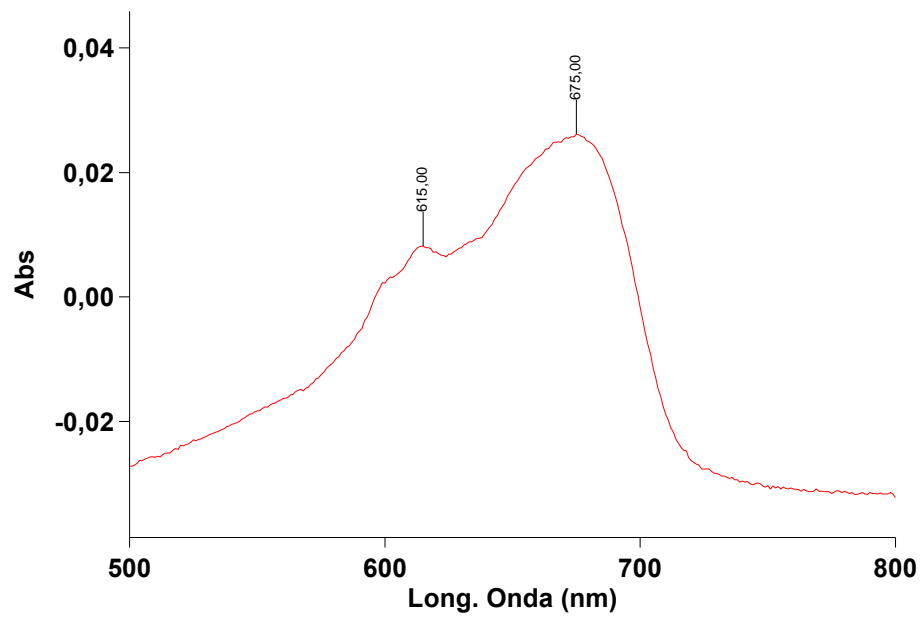

**Figure S439.** Absorption spectrum of (4) in DMSO (1 mM) zone 500-800 nm

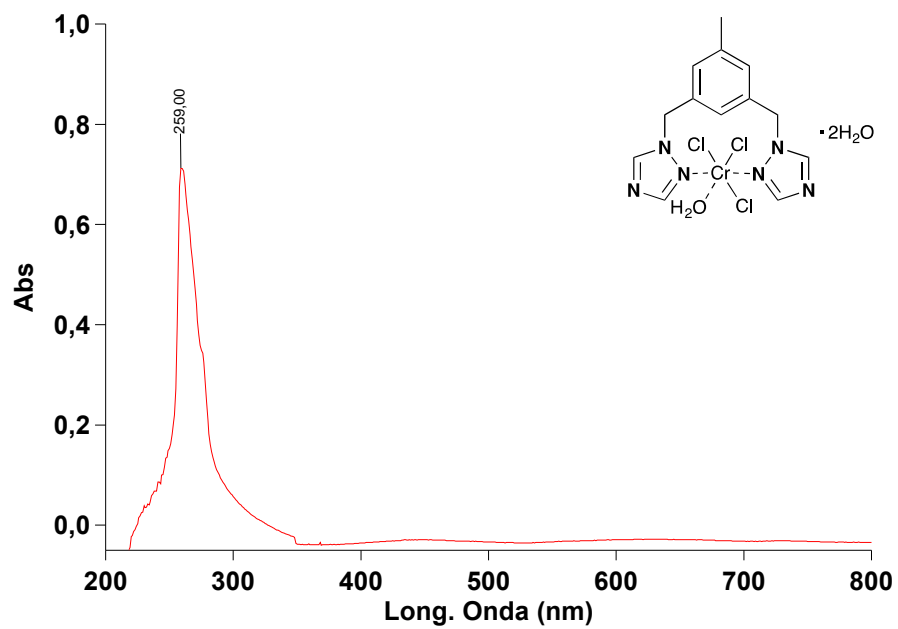

**Figure S44.** Absorption spectrum of (7) in DMSO (0,33 mM).

---



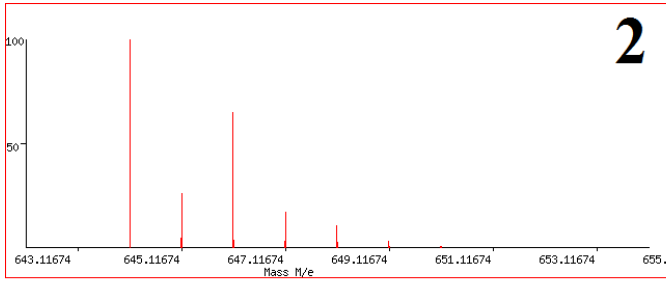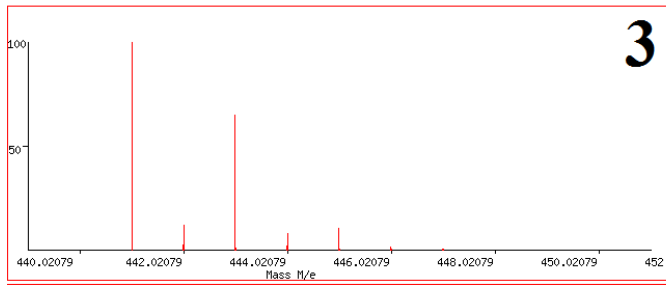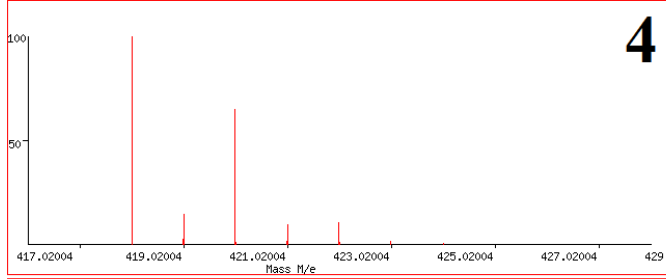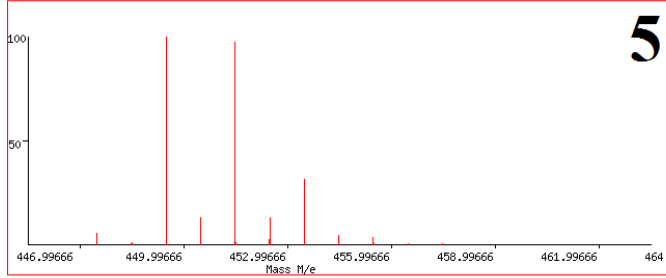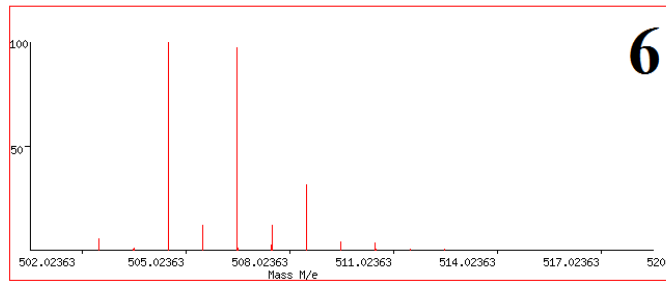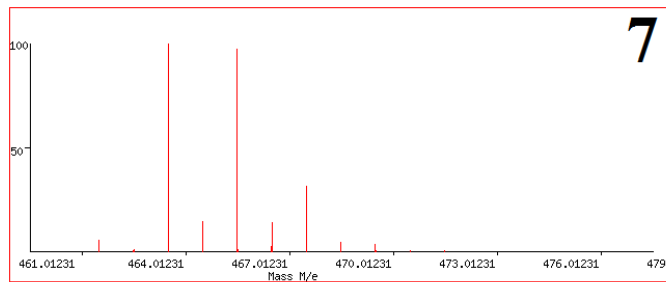

**Figure S45.** Mass-spectrum simulation for complexes **2-7**.

**Table S1.** Specific bands in the FTIR spectra observed for ligands and complexes. Py = pyridine, Tol = toluene, Tz = triazole; vs = very strong; s = strong; m = medium; w = weak; vw = very weak.

| Compound  | Wavenumber $\nu$ (cm <sup>-1</sup> ) |       |                                  |                     |                     |                               |                     |                               |
|-----------|--------------------------------------|-------|----------------------------------|---------------------|---------------------|-------------------------------|---------------------|-------------------------------|
|           | (O-H)                                | (C-H) | (C-N) <sub>Tz</sub>              | (N-N)               | (C-N) <sub>Tz</sub> | tension<br>ring <sub>Tz</sub> |                     |                               |
| <b>L1</b> | -                                    | 3094  | 1346                             | 1277                | 1138                | 891                           |                     |                               |
| <b>2</b>  | 3435                                 | 3119  | 1350                             | 1279                | 1128                | 889                           |                     |                               |
| <b>5</b>  | 3429                                 | 3124  | 1348                             | 1283                | 1123                | 889                           |                     |                               |
|           | (O-H)                                | (C-H) | stretching<br>ring <sub>Py</sub> | (C=N) <sub>Py</sub> | (C-N) <sub>Tz</sub> | (N-N)                         | (C-N) <sub>Tz</sub> | tension<br>ring <sub>Tz</sub> |
| <b>L2</b> | -                                    | 3105  | 1574                             | 1512                | 1462                | 1273                          | 1141                | 891                           |
| <b>3</b>  | 3402                                 | 3119  | 1576                             | 1524                | 1460                | 1277                          | 1125                | 883                           |
| <b>6</b>  | 3379                                 | 3130  | 1578                             | 1533                | 1460                | 1283                          | 1125                | 887                           |
|           | (O-H)                                | (C-H) | (C-C) <sub>Tol</sub>             | (C-N) <sub>Tz</sub> | (C-N) <sub>Tz</sub> | (N-N)                         | (C-N) <sub>Tz</sub> | tension<br>ring <sub>Tz</sub> |
| <b>1</b>  | -                                    | 3090  | 1609                             | 1466                | 1346                | 1261                          | 1134                | 891                           |
| <b>4</b>  | 3412                                 | 3111  | 1609                             | 1464                | 1352                | 1279                          | 1128                | 881                           |
| <b>7</b>  | 3375                                 | 3130  | 1612                             | 1462                | 1348                | 1285                          | 1125                | 887                           |

**Table S2.** Characteristic bands in the Raman spectra of 1,2,4-triazole, **L1**, **2** and **5**.

|                                      | Compound       |           |          |          |
|--------------------------------------|----------------|-----------|----------|----------|
|                                      | 1,2,4-triazole | <b>L1</b> | <b>2</b> | <b>5</b> |
|                                      | -              | 1612      | 1607     | 1609     |
|                                      | -              | 1507      | 1520     | 1528     |
|                                      | 1481           | -         | -        | -        |
|                                      | -              | 1431      | 1435     | 1430     |
|                                      | 1376           | 1367      | -        | 1362     |
| Wavenumber $\nu$ (cm <sup>-1</sup> ) | 1360           | 1341      | 1349     | -        |
|                                      | -              | 1271      | 1273     | 1278     |
|                                      | 1258           | 1237      | 1244     | 1237     |
|                                      | 1179           | 1171      | 1171     | 1172     |
|                                      | 1145           | 1136      | 1128     | 1123     |
|                                      | -              | 1015      | 1008     | 1000     |
|                                      | 977            | -         | -        | -        |
|                                      | 918            | -         | -        | -        |

**Table S3.** Characteristic bands in the Raman spectra of 1,2,4-triazole, **L2**, **3** and **6**.

|                                      | Compound       |           |          |          |
|--------------------------------------|----------------|-----------|----------|----------|
|                                      | 1,2,4-triazole | <b>L2</b> | <b>3</b> | <b>6</b> |
|                                      | 1481           | -         | -        | -        |
|                                      | -              | 1423      | 1430     | 1425     |
|                                      | 1376           | 1364      | -        | 1366     |
|                                      | 1360           | 1346      | 1348     | -        |
|                                      | 1145           | 1139      | 1125     | 1121     |
| Wavenumber $\nu$ (cm <sup>-1</sup> ) | -              | 1091      | -        | 1084     |
|                                      | -              | 1015      | 1014     | -        |
|                                      | -              | 991       | 994      | 998      |
|                                      | 977            | -         | -        | -        |
|                                      | 918            | -         | -        | -        |
|                                      | -              | 588       | 593      | 587      |
|                                      | -              | 525       | 522      | 518      |
|                                      | -              | 346       | 342      | 338      |
|                                      | -              | -         | 274      | 266      |

**Table S4.** Characteristic bands in the Raman spectra of 1,2,4-triazole, **1**, **4** and **7**.

|  | Compound       |          |          |          |
|--|----------------|----------|----------|----------|
|  | 1,2,4-triazole | <b>1</b> | <b>4</b> | <b>7</b> |
|  | -              | 1604     | 1605     | 1604     |
|  | -              | -        | 1520     | 1530     |
|  | -              | 1496     | 1464     | 1472     |
|  | 1481           | -        | -        | -        |
|  | 1376           | 1370     | 1358     | 1355     |
|  | 1299           | 1286     | 1282     | 1283     |
|  | 1145           | 1128     | 1127     | 1121     |
|  | -              | 1013     | 996      | 997      |
|  | 977            | -        | -        | -        |
|  | 918            | -        | -        | -        |
|  | -              | 760      | 759      | 757      |
|  | -              | 533      | 522      | 518      |

**Table S5.** Thermogravimetric results (TGA and DTG) for the complexes. n = number of decomposition steps.

| Compound<br>(Formula)                                                                               | TG range<br>/<br>°C | DTG<br>max/<br>°C | n | Mass loss<br>Estimated<br>(calcd.) / % | Total mass<br>loss | Assignm<br>ent<br>(probable)                                                     | Metallic<br>residue |
|-----------------------------------------------------------------------------------------------------|---------------------|-------------------|---|----------------------------------------|--------------------|----------------------------------------------------------------------------------|---------------------|
| <b>2</b><br><br>(C <sub>24</sub> H <sub>28</sub> Cl <sub>2</sub> CoN <sub>12</sub> O <sub>2</sub> ) | 238-342             | 301               | 1 | 44.60(42.74)                           | 83.85(85.35)       | Loss of<br>C <sub>12</sub> H <sub>12</sub> N <sub>6</sub> +<br>2H <sub>2</sub> O | CoCl                |
|                                                                                                     | 441-585             | 518               | 1 | 22.36(24.44)                           |                    |                                                                                  |                     |
|                                                                                                     | 586-695             | -                 | 1 | 16.89(18.17)                           |                    |                                                                                  |                     |
| <b>3</b><br><br>(C <sub>11</sub> H <sub>19</sub> Cl <sub>2</sub> CoN <sub>7</sub> O <sub>4</sub> )  | 26-156              | 58                | 1 | 3.69(4.06)                             | 64.56(64.81)       | Loss of<br>H <sub>2</sub> O                                                      | CoCNCl <sub>2</sub> |
|                                                                                                     | 157-230             | 184               | 1 | 0.97(0.90)                             |                    |                                                                                  |                     |
|                                                                                                     | 231-390             | 315, 347          | 2 | 26.27(27,30)                           |                    |                                                                                  |                     |
|                                                                                                     | 391-493             | 428               | 1 | 11.30(12.18)                           |                    |                                                                                  |                     |
|                                                                                                     | 494-695             | -                 | 1 | 22.33(20.37)                           |                    |                                                                                  |                     |
| <b>4</b><br><br>(C <sub>13</sub> H <sub>18</sub> Cl <sub>2</sub> CoN <sub>6</sub> O <sub>2</sub> )  | 26-298              | 270               | 1 | 18.19(19.99)                           | 62.15(62.82)       | Loss of<br>C <sub>2</sub> N <sub>3</sub> +<br>H <sub>2</sub> O                   | CoCNCl <sub>2</sub> |
|                                                                                                     | 299-338             | 322               | 1 | 7.46(7.85)                             |                    |                                                                                  |                     |
|                                                                                                     | 339-443             | 352               | 1 | 14.21(12.85)                           |                    |                                                                                  |                     |
|                                                                                                     | 444-619             | 500               | 1 | 17.14(17.85)                           |                    |                                                                                  |                     |
|                                                                                                     | 620-695             | -                 | 1 | 5.15(4.28)                             |                    |                                                                                  |                     |
|                                                                                                     |                     |                   |   |                                        |                    | Loss of<br>CH <sub>3</sub> +<br>H <sub>2</sub> O                                 |                     |
|                                                                                                     |                     |                   |   |                                        |                    | Loss of<br>C <sub>2</sub> H <sub>2</sub> N <sub>2</sub>                          |                     |

|                                                                                    |         |          |   |              |              |                                                                                                       |                   |
|------------------------------------------------------------------------------------|---------|----------|---|--------------|--------------|-------------------------------------------------------------------------------------------------------|-------------------|
|                                                                                    |         |          |   |              |              | Loss of<br>C <sub>6</sub> H <sub>3</sub>                                                              |                   |
|                                                                                    |         |          |   |              |              | Loss of<br>CH <sub>4</sub> + H <sub>2</sub>                                                           |                   |
| <b>5</b>                                                                           | 26-221  | 68, 144  | 2 | 11.43(11.93) | 63.56(64.94) | Loss of<br>3H <sub>2</sub> O                                                                          | CrCl <sub>3</sub> |
| (C <sub>12</sub> H <sub>18</sub> Cl <sub>3</sub> CrN <sub>6</sub> O <sub>3</sub> ) | 222-592 | 330, 421 | 2 | 45.93(46.83) |              |                                                                                                       |                   |
|                                                                                    | 593-695 | -        | 1 | 6.20(6.18)   |              | Loss of<br>C <sub>11</sub> H <sub>10</sub> N <sub>5</sub>                                             |                   |
|                                                                                    |         |          |   |              |              | Loss of<br>C <sub>1</sub> H <sub>2</sub> N <sub>1</sub>                                               |                   |
| <b>6</b>                                                                           | 26-235  | 63, 139  | 2 | 13.29(14.18) | 83.65(82.76) | Loss of<br>4H <sub>2</sub> O                                                                          | CrCl              |
| (C <sub>11</sub> H <sub>23</sub> Cl <sub>3</sub> CrN <sub>7</sub> O <sub>6</sub> ) | 236-695 | 446      | 1 | 70.36(68.58) |              |                                                                                                       |                   |
|                                                                                    |         |          |   |              |              | Loss of<br>C <sub>11</sub> H <sub>11</sub> N <sub>7</sub><br>+ Cl <sub>2</sub> +<br>2H <sub>2</sub> O |                   |
| <b>7</b>                                                                           | 26-206  | 66, 122  | 2 | 10.60(11.57) | 67.14()      | Loss of<br>3H <sub>2</sub> O                                                                          | CrCl <sub>3</sub> |
| (C <sub>13</sub> H <sub>20</sub> Cl <sub>3</sub> CrN <sub>6</sub> O <sub>3</sub> ) | 207-598 | 326, 426 | 2 | 51.49(51.27) |              |                                                                                                       |                   |
|                                                                                    | 599-695 | -        | 1 | 5.05(3.21)   |              | Loss of<br>C <sub>12</sub> H <sub>11</sub> N <sub>6</sub>                                             |                   |
|                                                                                    |         |          |   |              |              | Loss of<br>CH <sub>3</sub>                                                                            |                   |

---

### **Ethical issues**

All microorganisms used for the biological activity tests were ATCC reference strains classified in the risk group II according to article 67 of resolution 8430 of 1993 of the Ministry of Health of the Republic of Colombia, the cells represented moderate risk for human health and limited for the community. All experiment were performed in accordance with biosafety level II and guidelines established in the decree 351 of 2014 related to the integral management in health care and other activities, as well as the guidelines set out in the Colombian Technical Guide GTC 86, for the implementation of integral waste management.
